# Supplementary material for: Version 6 of the consensus yeast metabolic network refines biochemical coverage and improves model performance
Source: PubMed Central journal article supplement (PMC3739857; doi:10.1093/database/bat059), 2013-08-09
Supplement: supp_bat059_testYeasteg.pdf [file supp_bat059_testYeasteg.pdf]

```
function [results]=testYeast(model, varargin)

% testYeast: a tool for evaluating the Consensus Reconstruction
%
% Input:
%   model      A COBRA Toolbox-format yeast model. Tested with:
%              Yeast 5 - doi:10.1186/1752-0509-6-55
%              Yeast 6 - http://yeast.sf.net (to be published)
%
%   medium (optional)
%       0 = use model-defined medium (default)
%       1 = use minimal medium
%
%   blocked (optional)
%       0 = do not find blocked reactions (default)
%       1 = find blocked reactions (uses FVA, takes longer)
%
%   output (optional)
%       0 = silent
%       1 = default screen output
%       2 = verbose screen output
%
% Output:
%   results  a structure containing the following fields:
%            description = model.description
%            TP = true positive KO predictions (model predicts growth
%            when nonessential genes are deleted)
%            TN = true negative KO predictions
%            FP = false positive KO predictions
%            FN = false negative KO predictions
%            auxotrophs = auxotroph-inducing genes in model
%            auxotroph_viable = auxotrophs incorrectly predicted to be
%            viable in minimal media
%            auxotroph_inviable = auxotrophs incorrectly predicted to be
%            inviable in supplemented media
%            dubious = dubious ORFs in model
%            blocked = blocked reactions in model
%            medium = medium used
%
% modified BH 20 Feb 2013

%% citation
%
% based on testYeastmodel code by kieran smallbone and ben heavner, doi:
% 10.1186/1752-0509-6-55
%
% please cite: Heavner, Benjamin D., Kieran Smallbone, Nathan Price, and
% Larry P. Walker. "Version 6 of the Consensus Yeast Metabolic Network."
% NEED TO ADD CITATION DETAILS

%% process input arguments
% 3 optional inputs (4 total) at most
numvarargs = length(varargin);
if numvarargs > 3
    error('myfuncs:testYeast:TooManyInputs', ...
        'requires at most 3 optional inputs');
end

% set defaults for optional inputs
```

```
optargs = {0 0 1};

% put defaults values into into the valuesToUse cell array,
% and overwrite the ones specified in varargin.
optargs(1:numvarargs) = varargin;

% Place optional args in memorable variable names
[medium blocked output] = optargs{:};

%% set tolerance for KO growth
ko_tol = 1e-6;

%% simple model statistics

if output
    fprintf('\n%s\n\t%s\t%s\n\n\t%g\t%s\n\t%4g\t%s\n\n',...
        'Model Description:', 'name:', model.description,...
        length(model.mets), 'metabolites',...
        length(model.rxns), 'reactions',...
        length(model.genes), 'genes');
end

%% dubious ORFs

dubiousORFs = setdiff(model.genes,verifiedORFs);

if output
    fprintf('\t%4g\t(%.2f%%)\t%s\n',length(dubiousORFs),...
        (100*length(dubiousORFs)/length(model.genes)), 'dubious ORFs');
end

if output == 2
    fprintf('\n\t%s\n','list ORFs included in the model but annotated as dubious by ↵
SGD:');
    for k = 1:length(dubiousORFs)
        fprintf('\t\t%s\n',dubiousORFs{k});
    end
end

%% adjust model medium
% ammonium, glucose, oxygen, phosphate, sulphate
%
% note: this isn't a realistic medium (no H+ or H2O for example), but iFF,
% iND, IMM, iAZ, and Y5/6 all predict biomass formation with just these
% components, so it's useful for testing models.

if medium
    if output
        fprintf('\nMaking minimal medium...\n');
    end

    % start with a clean slate: unconstrained excretion, no uptake)
    exchangeRxns = findExcRxns(model);
    model.lb(exchangeRxns) = 0;
    model.ub(exchangeRxns) = 1000;
    desiredExchanges = {...
        'r_1654'; ... % 'ammonium exchange';
        'r_1992'; ... % 'oxygen exchange';
        'r_2005'; ... % 'phosphate exchange';
        'r_2060'; ... % 'sulphate exchange';
```

```
};
glucoseExchange = {...
    'r_1714'; ... % D-glucose exchange
};
uptakeRxnIndexes = findRxnIDs(model,desiredExchanges);
glucoseExchangeIndex = findRxnIDs(model,glucoseExchange);
if length(uptakeRxnIndexes) ~= 4;
    error('Not all exchange reactions were found.')
end
model.lb(uptakeRxnIndexes)=-1000;
model.lb(glucoseExchangeIndex)=-10;
else
    if output
        fprintf('\nUsing model-default medium...\n');
    end
end

%% create model with complete medium (all exchange reactions switched on)

exchangeRxns = findExcRxns(model);

model_maximal = model;
model_maximal.lb(exchangeRxns) = -1000;
model_maximal.ub(exchangeRxns) = 1000;

%% describe medium
if output
    fprintf('\nCurrent growth medium composition:\n');
    media_indexes = all([exchangeRxns,model.lb ~= 0],2);
    disp([model.rxns(media_indexes) model.rxnNames(media_indexes) ...
        num2cell(model.lb(media_indexes)) num2cell(model.ub(media_indexes))]);
end

%% find blocked reactions (cannot carry any flux)

if blocked
    blockedReactions = findBlockedReaction(model_maximal);

    if output
        fprintf('\n%.0f\t(%.2f%%)\t%s\n',length(blockedReactions),...
            (100*length(blockedReactions)/length(model_maximal.rxns)),...
            'blocked reactions');
    end

    if output == 2
        fprintf('\n\t%s\n','list of blocked reactions:');
        for k = 1:length(blockedReactions)
            fprintf('\t\t%s\n',blockedReactions{k});
        end
    end
end

%% knockout analysis

inviabileORFsAll = union(inviabileORFs,auxotrophicORFs);
% combine inviable with auxotrophy list - none of these mutants should grow
% in minimal media

exp_retarded = intersect(model.genes,inviabileORFsAll);
exp_retarded = intersect(exp_retarded,verifiedORFs);
```



```

% or at least an approximation thereof

auxotrophs = intersect(model.genes,auxotrophicORFs);
auxotrophs = intersect(auxotrophs,verifiedORFs);
n_aux = length(auxotrophs);

grRatio = singleGeneDeletion(model_maximal);

aux_fail = intersect(auxotrophs,mod_viable);

aux_viable = model.genes(grRatio >= ko_tol);
aux_viable = intersect(aux_viable,auxotrophs);
aux_viable = setdiff(aux_viable,aux_fail);
aux_retarded = model.genes(grRatio < ko_tol);
aux_retarded = intersect(aux_retarded,auxotrophs);
aux_retarded = setdiff(aux_retarded,aux_fail);

if output
    fprintf('auxotrophy analysis:\n');
    fprintf('\t%g\t%s\n\t%g\t[%.2f %%]\t%s\n\t%g\t[%.2f %%]\t%s\n\t%g\t[%.2f %%]\t%
s\n',...
        n_aux,'genes',...
        length(aux_viable),(100*length(aux_viable)/n_aux),...
        'correctly predicted',...
        length(aux_fail),(100*length(aux_fail)/n_aux),...
        'viable in minimal medium',...
        length(aux_retarded),(100*length(aux_retarded)/n_aux),...
        'inviabile in maximal medium');
end

if output == 2
    fprintf('\tlist of auxotrophs viable in minimal medium:\n');
    for k = 1:length(aux_fail)
        fprintf('\t\t%s\n',aux_fail{k});
    end

    fprintf('\n\tlist of auxotrophs inviabile in maximal medium:\n');
    for k = 1:length(aux_retarded)
        fprintf('\t\t%s\n',aux_retarded{k});
    end
end

if output
    fprintf('==\n\n');
end

%% report results
results.description = model.description;
results.TP = tp;
results.TN = tn;
results.FP = fp;
results.FN = fn;
results.auxotrophs = auxotrophs;
results.auxotroph_viable = aux_fail;
results.auxotroph_inviabile = aux_retarded;
results.dubious = dubiousORFs;
if exist('blockedReactions')
    results.blocked = blockedReactions;
end
if medium

```

```

    results.medium = 'minimal medium';
else
    results.medium = 'model default medium';
end

end

%% required functions

function blockedReactions = findBlockedReaction(model)
%findBlockedReaction determines those reactions which cannot carry any
%flux in the given simulation conditions.
%
% BlockedReaction = findBlockedReaction(model)
%
%INPUT
% model          COBRA model structure
%
%OUTPUT
% blockedReactions  List of blocked reactions
%
%
% Ines Thiele 02/09
% kieran: 15 aug 11
% James Eddy: 19 Feb 13

tol = 1e-10;
% << changed by ks
% blockedReactions = [];
%blockedReactions = {};
% >>
[minMax(:,1),minMax(:,2)] = fluxVariability(model,0);
%cnt = 1;
%for i=1:length(minMax)
%    if (minMax(i,2) < tol && minMax(i,2) > -tol && minMax(i,1) < tol && minMax(i,1) > -tol)
%        blockedReactions(cnt) = model.rxns(i); %#ok<AGROW>
%        cnt = cnt + 1;
%    end
%end

blocked = abs(minMax(:,1)) < tol & abs(minMax(:,2)) < tol;
blockedReactions = model.rxns(blocked);

end

%% gene lists
% BH is Ben Heavner (bheavner@gmail.com), HA is Hnin Aung
% (hnin.w.aung@gmail.com)
function genes = inviableORFs

% list of 1192 unique inviable ORFs taken from the Yeast Deletion Project (14 aug
% 11)
% http://www-sequence.stanford.edu/group/yeast_deletion_project/downloads.html

genes = {'YAL001C'; 'YAL003W'; 'YAL025C'; 'YAL032C'; 'YAL033W'; 'YAL034W-a'; 'YAL035C-
A'; 'YAL038W'; 'YAL041W'; 'YAL043C'; 'YAR007C'; 'YAR008W'; 'YAR019C'; 'YBL004W'; 'YBL014C'; 'YBL018
C'; 'YBL020W'; 'YBL023C'; 'YBL026W'; 'YBL030C'; 'YBL034C'; 'YBL035C'; 'YBL040C'; 'YBL041W'; 'YBL050
W'; 'YBL073W'; 'YBL074C'; 'YBL076C'; 'YBL077W'; 'YBL084C'; 'YBL092W'; 'YBL097W'; 'YBL105C'; 'YBR002
C'; 'YBR004C'; 'YBR011C'; 'YBR029C'; 'YBR038W'; 'YBR049C'; 'YBR055C'; 'YBR060C'; 'YBR070C'; 'YBR079

```

C'; 'YBR080C'; 'YBR087W'; 'YBR087W'; 'YBR088C'; 'YBR089W'; 'YBR091C'; 'YBR102C'; 'YBR109C'; 'YBR110 W'; 'YBR123C'; 'YBR124W'; 'YBR135W'; 'YBR136W'; 'YBR140C'; 'YBR142W'; 'YBR143C'; 'YBR152W'; 'YBR153 W'; 'YBR154C'; 'YBR155W'; 'YBR160W'; 'YBR167C'; 'YBR190W'; 'YBR192W'; 'YBR193C'; 'YBR196C'; 'YBR198 W'; 'YBR202W'; 'YBR211C'; 'YBR233W-A'; 'YBR233W-  
A'; 'YBR234C'; 'YBR236C'; 'YBR237W'; 'YBR243C'; 'YBR247C'; 'YBR252W'; 'YBR253W'; 'YBR254C'; 'YBR256 W'; 'YBR257W'; 'YBR265W'; 'YCL003W'; 'YCL017C'; 'YCL031C'; 'YCL031C'; 'YCL031C'; 'YCL043C'; 'YCL052 W'; 'YCL053C'; 'YCL054W'; 'YCL059C'; 'YCR012W'; 'YCR012W'; 'YCR013C'; 'YCR013C'; 'YCR035C'; 'YCR052 W'; 'YCR054C'; 'YCR057C'; 'YCR072C'; 'YCR093W'; 'YDL003W'; 'YDL004W'; 'YDL007W'; 'YDL008W'; 'YDL014 W'; 'YDL015C'; 'YDL016C'; 'YDL017W'; 'YDL028C'; 'YDL029W'; 'YDL030W'; 'YDL031W'; 'YDL043C'; 'YDL045 W'; 'YDL055C'; 'YDL058W'; 'YDL060W'; 'YDL064W'; 'YDL084W'; 'YDL087C'; 'YDL092W'; 'YDL097C'; 'YDL098 W'; 'YDL102W'; 'YDL103C'; 'YDL105W'; 'YDL108W'; 'YDL111C'; 'YDL120W'; 'YDL126C'; 'YDL132W'; 'YDL139 W'; 'YDL140C'; 'YDL141W'; 'YDL143W'; 'YDL145C'; 'YDL147W'; 'YDL148C'; 'YDL150W'; 'YDL152W'; 'YDL153 W'; 'YDL163W'; 'YDL164C'; 'YDL165W'; 'YDL166C'; 'YDL193W'; 'YDL195W'; 'YDL196W'; 'YDL205C'; 'YDL207 W'; 'YDL208W'; 'YDL209C'; 'YDL212W'; 'YDL217C'; 'YDL220C'; 'YDL221W'; 'YDL235C'; 'YDR002W'; 'YDR013 W'; 'YDR016C'; 'YDR021W'; 'YDR023W'; 'YDR037W'; 'YDR041W'; 'YDR044W'; 'YDR045C'; 'YDR047W'; 'YDR050 W'; 'YDR050C'; 'YDR052C'; 'YDR053W'; 'YDR054C'; 'YDR060W'; 'YDR062W'; 'YDR064W'; 'YDR081C'; 'YDR082 W'; 'YDR086C'; 'YDR087C'; 'YDR088C'; 'YDR091C'; 'YDR113C'; 'YDR118W'; 'YDR141C'; 'YDR145W'; 'YDR160 W'; 'YDR164C'; 'YDR166C'; 'YDR167W'; 'YDR168W'; 'YDR170C'; 'YDR172W'; 'YDR177W'; 'YDR180W'; 'YDR182 W'; 'YDR187C'; 'YDR188W'; 'YDR189W'; 'YDR190C'; 'YDR196C'; 'YDR201W'; 'YDR208W'; 'YDR211W'; 'YDR212 W'; 'YDR224C'; 'YDR224C'; 'YDR224C'; 'YDR228C'; 'YDR232W'; 'YDR235W'; 'YDR236C'; 'YDR238C'; 'YDR240 W'; 'YDR243C'; 'YDR246W'; 'YDR267C'; 'YDR280W'; 'YDR288W'; 'YDR292C'; 'YDR299W'; 'YDR301W'; 'YDR302 W'; 'YDR303C'; 'YDR308C'; 'YDR311W'; 'YDR320C-A'; 'YDR320C-  
A'; 'YDR324C'; 'YDR325W'; 'YDR327W'; 'YDR328C'; 'YDR331W'; 'YDR339C'; 'YDR341C'; 'YDR353W'; 'YDR355 W'; 'YDR356W'; 'YDR361C'; 'YDR362C'; 'YDR365C'; 'YDR367W'; 'YDR373W'; 'YDR376W'; 'YDR381W'; 'YDR390 W'; 'YDR394W'; 'YDR396W'; 'YDR397C'; 'YDR398W'; 'YDR404C'; 'YDR407C'; 'YDR412W'; 'YDR413C'; 'YDR416 W'; 'YDR427W'; 'YDR427W'; 'YDR429C'; 'YDR434W'; 'YDR437W'; 'YDR449C'; 'YDR454C'; 'YDR460W'; 'YDR464 W'; 'YDR468C'; 'YDR472W'; 'YDR473C'; 'YDR478W'; 'YDR487C'; 'YDR489W'; 'YDR498C'; 'YDR499W'; 'YDR510 W'; 'YDR526C'; 'YDR527W'; 'YDR531W'; 'YEL002C'; 'YEL019C'; 'YEL026W'; 'YEL032W'; 'YEL034W'; 'YEL035 W'; 'YEL055C'; 'YEL058W'; 'YER003C'; 'YER006W'; 'YER008C'; 'YER009W'; 'YER012W'; 'YER013W'; 'YER018 W'; 'YER021W'; 'YER022W'; 'YER023W'; 'YER025W'; 'YER029C'; 'YER029C'; 'YER036C'; 'YER038C'; 'YER043 W'; 'YER048W-A'; 'YER074W-A'; 'YER074W-  
A'; 'YER082C'; 'YER093C'; 'YER094C'; 'YER104W'; 'YER112W'; 'YER125W'; 'YER126C'; 'YER127W'; 'YER133 W'; 'YER136W'; 'YER146W'; 'YER147C'; 'YER148W'; 'YER157W'; 'YER159C'; 'YER165W'; 'YER168C'; 'YER171 W'; 'YER172C'; 'YFL002C'; 'YFL005W'; 'YFL008W'; 'YFL009W'; 'YFL017C'; 'YFL018W-  
A'; 'YFL022C'; 'YFL024C'; 'YFL029C'; 'YFL035C'; 'YFL035C-  
A'; 'YFL037W'; 'YFL038C'; 'YFL039C'; 'YFL045C'; 'YFR002W'; 'YFR003C'; 'YFR004W'; 'YFR005C'; 'YFR027 W'; 'YFR028C'; 'YFR029W'; 'YFR031C'; 'YFR037C'; 'YFR042W'; 'YFR050C'; 'YFR051C'; 'YFR052W'; 'YGL001 W'; 'YGL008C'; 'YGL011C'; 'YGL018C'; 'YGL022W'; 'YGL030W'; 'YGL040C'; 'YGL044C'; 'YGL044C'; 'YGL044 W'; 'YGL047W'; 'YGL048C'; 'YGL055W'; 'YGL061C'; 'YGL065C'; 'YGL068W'; 'YGL069C'; 'YGL073W'; 'YGL074 W'; 'YGL075C'; 'YGL091C'; 'YGL092W'; 'YGL093W'; 'YGL097W'; 'YGL097W'; 'YGL098W'; 'YGL099W'; 'YGL102 W'; 'YGL103W'; 'YGL111W'; 'YGL112C'; 'YGL113W'; 'YGL116W'; 'YGL120C'; 'YGL122C'; 'YGL123W'; 'YGL128 W'; 'YGL130W'; 'YGL137W'; 'YGL142C'; 'YGL145W'; 'YGL145W'; 'YGL145W'; 'YGL150C'; 'YGL155W'; 'YGL169 W'; 'YGL171W'; 'YGL172W'; 'YGL201C'; 'YGL207W'; 'YGL225W'; 'YGL233W'; 'YGL238W'; 'YGL239C'; 'YGL239 W'; 'YGL245W'; 'YGL247W'; 'YGR002C'; 'YGR005C'; 'YGR009C'; 'YGR013W'; 'YGR024C'; 'YGR029W'; 'YGR029 W'; 'YGR029W'; 'YGR030C'; 'YGR046W'; 'YGR047C'; 'YGR048W'; 'YGR060W'; 'YGR065C'; 'YGR073C'; 'YGR074 W'; 'YGR075C'; 'YGR082W'; 'YGR083C'; 'YGR090W'; 'YGR091W'; 'YGR094W'; 'YGR095C'; 'YGR098C'; 'YGR099 W'; 'YGR103W'; 'YGR113W'; 'YGR114C'; 'YGR115C'; 'YGR116W'; 'YGR119C'; 'YGR120C'; 'YGR128C'; 'YGR140 W'; 'YGR145W'; 'YGR147C'; 'YGR156W'; 'YGR158C'; 'YGR172C'; 'YGR175C'; 'YGR179C'; 'YGR185C'; 'YGR186 W'; 'YGR190C'; 'YGR191W'; 'YGR195W'; 'YGR198W'; 'YGR211W'; 'YGR216C'; 'YGR218W'; 'YGR245C'; 'YGR246 W'; 'YGR251W'; 'YGR253C'; 'YGR264C'; 'YGR265W'; 'YGR267C'; 'YGR274C'; 'YGR277C'; 'YGR278W'; 'YGR280 W'; 'YHL015W'; 'YHR005C-  
A'; 'YHR007C'; 'YHR019C'; 'YHR020W'; 'YHR023W'; 'YHR024C'; 'YHR036W'; 'YHR040W'; 'YHR042W'; 'YHR058 W'; 'YHR062C'; 'YHR065C'; 'YHR068W'; 'YHR069C'; 'YHR070W'; 'YHR072W'; 'YHR072W-A'; 'YHR072W-  
A'; 'YHR074W'; 'YHR083W'; 'YHR085W'; 'YHR088W'; 'YHR088W'; 'YHR088W'; 'YHR089C'; 'YHR089C'; 'YHR101 W'; 'YHR102W'; 'YHR102W'; 'YHR107C'; 'YHR118C'; 'YHR122W'; 'YHR128W'; 'YHR128W'; 'YHR143W-  
A'; 'YHR148W'; 'YHR164C'; 'YHR165C'; 'YHR165C'; 'YHR166C'; 'YHR169W'; 'YHR169W'; 'YHR170W'; 'YHR172 W'; 'YHR186C'; 'YHR188C'; 'YHR188C'; 'YHR188C'; 'YHR190W'; 'YHR196W'; 'YHR197W'; 'YHR197W'; 'YHR197 W'; 'YHR199C-A'; 'YHR199C-  
A'; 'YIL003W'; 'YIL004C'; 'YIL019W'; 'YIL021W'; 'YIL022W'; 'YIL026C'; 'YIL031W'; 'YIL046W'; 'YIL048 W'; 'YIL051C'; 'YIL061C'; 'YIL062C'; 'YIL063C'; 'YIL068C'; 'YIL075C'; 'YIL078W'; 'YIL083C'; 'YIL091 W

C'; 'YIL104C'; 'YIL106W'; 'YIL106W'; 'YIL106W'; 'YIL109C'; 'YIL115C'; 'YIL118W'; 'YIL126W'; 'YIL129 W' <br> C'; 'YIL142W'; 'YIL143C'; 'YIL144W'; 'YIL147C'; 'YIL150C'; 'YIL171W'; 'YIR006C'; 'YIR008C'; 'YIR010 W' <br> W'; 'YIR011C'; 'YIR012W'; 'YIR015W'; 'YIR022W'; 'YJL001W'; 'YJL002C'; 'YJL005W'; 'YJL008C'; 'YJL008 W' <br> C'; 'YJL008C'; 'YJL009W'; 'YJL010C'; 'YJL011C'; 'YJL014W'; 'YJL015C'; 'YJL018W'; 'YJL019W'; 'YJL025 W' <br> W'; 'YJL026W'; 'YJL031C'; 'YJL032W'; 'YJL033W'; 'YJL034W'; 'YJL035C'; 'YJL039C'; 'YJL041W'; 'YJL050 W' <br> W'; 'YJL054W'; 'YJL061W'; 'YJL069C'; 'YJL072C'; 'YJL074C'; 'YJL076W'; 'YJL081C'; 'YJL085W'; 'YJL086 W' <br> C'; 'YJL087C'; 'YJL090C'; 'YJL091C'; 'YJL097W'; 'YJL104W'; 'YJL109C'; 'YJL111W'; 'YJL125C'; 'YJL143 W' <br> W'; 'YJL156C'; 'YJL167W'; 'YJL173C'; 'YJL174W'; 'YJL194W'; 'YJL195C'; 'YJL195C'; 'YJL202C'; 'YJL202 W' <br> C'; 'YJL203W'; 'YJR002W'; 'YJR006W'; 'YJR007W'; 'YJR012C'; 'YJR013W'; 'YJR016C'; 'YJR017C'; 'YJR022 W' <br> W'; 'YJR023C'; 'YJR041C'; 'YJR042W'; 'YJR045C'; 'YJR046W'; 'YJR046W'; 'YJR046W'; 'YJR057W'; 'YJR064 W' <br> W'; 'YJR065C'; 'YJR067C'; 'YJR068W'; 'YJR072C'; 'YJR076C'; 'YJR089W'; 'YJR089W'; 'YJR093C'; 'YJR112 W' <br> W'; 'YJR123W'; 'YJR141W'; 'YKL004W'; 'YKL006C- <br> A'; 'YKL012W'; 'YKL013C'; 'YKL014C'; 'YKL018W'; 'YKL019W'; 'YKL021C'; 'YKL022C'; 'YKL024C'; 'YKL028 W' <br> W'; 'YKL033W'; 'YKL035W'; 'YKL036C'; 'YKL042W'; 'YKL045W'; 'YKL049C'; 'YKL049C'; 'YKL049C'; 'YKL052 W' <br> C'; 'YKL058W'; 'YKL059C'; 'YKL060C'; 'YKL078W'; 'YKL082C'; 'YKL083W'; 'YKL088W'; 'YKL089W'; 'YKL095 W' <br> W'; 'YKL099C'; 'YKL104C'; 'YKL108W'; 'YKL111C'; 'YKL112W'; 'YKL122C'; 'YKL125W'; 'YKL138C- <br> A'; 'YKL138C- <br> A'; 'YKL141W'; 'YKL144C'; 'YKL145W'; 'YKL152C'; 'YKL153W'; 'YKL154W'; 'YKL165C'; 'YKL172W'; 'YKL172 W' <br> W'; 'YKL172W'; 'YKL173W'; 'YKL180W'; 'YKL182W'; 'YKL186C'; 'YKL189W'; 'YKL193C'; 'YKL195W'; 'YKL196 W' <br> C'; 'YKL203C'; 'YKL210W'; 'YKR002W'; 'YKR004C'; 'YKR008W'; 'YKR022C'; 'YKR025W'; 'YKR037C'; 'YKR038 W' <br> C'; 'YKR062W'; 'YKR063C'; 'YKR068C'; 'YKR071C'; 'YKR079C'; 'YKR081C'; 'YKR083C'; 'YKR086W'; 'YLL003 W' <br> W'; 'YLL004W'; 'YLL008W'; 'YLL011W'; 'YLL018C'; 'YLL031C'; 'YLL034C'; 'YLL035W'; 'YLL036C'; 'YLL037 W' <br> W'; 'YLL050C'; 'YLR002C'; 'YLR005W'; 'YLR007W'; 'YLR008C'; 'YLR009W'; 'YLR010C'; 'YLR022C'; 'YLR026 W' <br> C'; 'YLR029C'; 'YLR033W'; 'YLR045C'; 'YLR051C'; 'YLR060W'; 'YLR066W'; 'YLR071C'; 'YLR075W'; 'YLR076 W' <br> C'; 'YLR078C'; 'YLR086W'; 'YLR088W'; 'YLR099W-A'; 'YLR099W- <br> A'; 'YLR100W'; 'YLR101C'; 'YLR103C'; 'YLR105C'; 'YLR106C'; 'YLR115W'; 'YLR116W'; 'YLR117C'; 'YLR127 W' <br> C'; 'YLR129W'; 'YLR132C'; 'YLR140W'; 'YLR141W'; 'YLR145W'; 'YLR147C'; 'YLR153C'; 'YLR163C'; 'YLR166 W' <br> C'; 'YLR167W'; 'YLR175W'; 'YLR186W'; 'YLR186W'; 'YLR195C'; 'YLR196W'; 'YLR197W'; 'YLR198C'; 'YLR208 W' <br> W'; 'YLR212C'; 'YLR215C'; 'YLR222C'; 'YLR223C'; 'YLR229C'; 'YLR230W'; 'YLR243W'; 'YLR249W'; 'YLR259 W' <br> C'; 'YLR272C'; 'YLR274W'; 'YLR275W'; 'YLR276C'; 'YLR277C'; 'YLR291C'; 'YLR293C'; 'YLR298C'; 'YLR305 W' <br> C'; 'YLR310C'; 'YLR314C'; 'YLR316C'; 'YLR316C'; 'YLR316C'; 'YLR317W'; 'YLR321C'; 'YLR323C'; 'YLR336 W' <br> C'; 'YLR339C'; 'YLR340W'; 'YLR347C'; 'YLR355C'; 'YLR359W'; 'YLR378C'; 'YLR379W'; 'YLR383W'; 'YLR397 W' <br> C'; 'YLR409C'; 'YLR424W'; 'YLR430W'; 'YLR438C- <br> A'; 'YLR440C'; 'YLR457C'; 'YLR458W'; 'YLR459W'; 'YML010W'; 'YML015C'; 'YML015C'; 'YML023C'; 'YML023 W' <br> C'; 'YML025C'; 'YML031W'; 'YML043C'; 'YML046W'; 'YML049C'; 'YML064C'; 'YML065W'; 'YML069W'; 'YML077 W' <br> W'; 'YML085C'; 'YML091C'; 'YML092C'; 'YML092C'; 'YML092C'; 'YML093W'; 'YML098W'; 'YML105C'; 'YML114 W' <br> C'; 'YML125C'; 'YML126C'; 'YML127W'; 'YML130C'; 'YMR001C'; 'YMR005W'; 'YMR005W'; 'YMR013C'; 'YMR028 W' <br> W'; 'YMR033W'; 'YMR033W'; 'YMR043W'; 'YMR047C'; 'YMR047C'; 'YMR049C'; 'YMR059W'; 'YMR059W'; 'YMR059 W' <br> W'; 'YMR061W'; 'YMR076C'; 'YMR079W'; 'YMR093W'; 'YMR094W'; 'YMR108W'; 'YMR108W'; 'YMR112C'; 'YMR113 W' <br> W'; 'YMR117C'; 'YMR128W'; 'YMR131C'; 'YMR134W'; 'YMR146C'; 'YMR149W'; 'YMR168C'; 'YMR197C'; 'YMR200 W' <br> W'; 'YMR203W'; 'YMR208W'; 'YMR211W'; 'YMR213W'; 'YMR218C'; 'YMR220W'; 'YMR227C'; 'YMR229C'; 'YMR235 W' <br> C'; 'YMR236W'; 'YMR239C'; 'YMR240C'; 'YMR260C'; 'YMR268C'; 'YMR270C'; 'YMR277W'; 'YMR281W'; 'YMR288 W' <br> W'; 'YMR290C'; 'YMR290W- <br> A'; 'YMR296C'; 'YMR298W'; 'YMR301C'; 'YMR308C'; 'YMR309C'; 'YMR314W'; 'YNL002C'; 'YNL006W'; 'YNL007 W' <br> C'; 'YNL024C-A'; 'YNL024C- <br> A'; 'YNL026W'; 'YNL036W'; 'YNL036W'; 'YNL038W'; 'YNL039W'; 'YNL061W'; 'YNL062C'; 'YNL075W'; 'YNL088 W' <br> W'; 'YNL102W'; 'YNL103W'; 'YNL110C'; 'YNL112W'; 'YNL112W'; 'YNL112W'; 'YNL113W'; 'YNL114C'; 'YNL118 W' <br> C'; 'YNL124W'; 'YNL126W'; 'YNL126W'; 'YNL131W'; 'YNL132W'; 'YNL137C'; 'YNL138W-A'; 'YNL138W- <br> A'; 'YNL149C'; 'YNL150W'; 'YNL151C'; 'YNL152W'; 'YNL158W'; 'YNL161W'; 'YNL163C'; 'YNL172W'; 'YNL178 W' <br> W'; 'YNL181W'; 'YNL182C'; 'YNL188W'; 'YNL189W'; 'YNL207W'; 'YNL216W'; 'YNL221C'; 'YNL222W'; 'YNL232 W' <br> W'; 'YNL240C'; 'YNL244C'; 'YNL245C'; 'YNL247W'; 'YNL251C'; 'YNL256W'; 'YNL258C'; 'YNL260C'; 'YNL261 W' <br> W'; 'YNL262W'; 'YNL263C'; 'YNL267W'; 'YNL272C'; 'YNL282W'; 'YNL287W'; 'YNL290W'; 'YNL306W'; 'YNL308 W' <br> C'; 'YNL310C'; 'YNL312W'; 'YNL313C'; 'YNL317W'; 'YNR003C'; 'YNR011C'; 'YNR016C'; 'YNR017W'; 'YNR026 W' <br> C'; 'YNR035C'; 'YNR038W'; 'YNR043W'; 'YNR046W'; 'YNR053C'; 'YNR054C'; 'YOL005C'; 'YOL010W'; 'YOL021 W' <br> C'; 'YOL022C'; 'YOL026C'; 'YOL034W'; 'YOL038W'; 'YOL040C'; 'YOL066C'; 'YOL069W'; 'YOL077C'; 'YOL078 W' <br> W'; 'YOL094C'; 'YOL097C'; 'YOL102C'; 'YOL120C'; 'YOL123W'; 'YOL127W'; 'YOL130W'; 'YOL133W'; 'YOL134 W' <br> C'; 'YOL135C'; 'YOL139C'; 'YOL142W'; 'YOL142W'; 'YOL144W'; 'YOL146W'; 'YOL149W'; 'YOR004W'; 'YOR020 W' <br> C'; 'YOR046C'; 'YOR048C'; 'YOR056C'; 'YOR057W'; 'YOR060C'; 'YOR063W'; 'YOR074C'; 'YOR075W'; 'YOR077 W' <br> W'; 'YOR095C'; 'YOR098C'; 'YOR102W'; 'YOR103C'; 'YOR110W'; 'YOR116C'; 'YOR117W'; 'YOR119C'; 'YOR122 W' <br> C'; 'YOR143C'; 'YOR145C'; 'YOR146W'; 'YOR148C'; 'YOR149C'; 'YOR151C'; 'YOR157C'; 'YOR159C'; 'YOR160 W' </p></div>



```

W'; 'YOR168W'; 'YOR169C'; 'YOR174W'; 'YOR176W'; 'YOR181W'; 'YOR194C'; 'YOR203W'; 'YOR204W'; 'YOR206
W'; 'YOR207C'; 'YOR210W'; 'YOR217W'; 'YOR218C'; 'YOR224C'; 'YOR232W'; 'YOR236W'; 'YOR244W'; 'YOR249
C'; 'YOR250C'; 'YOR254C'; 'YOR256C'; 'YOR257W'; 'YOR259C'; 'YOR260W'; 'YOR261C'; 'YOR262W'; 'YOR272
W'; 'YOR278W'; 'YOR281C'; 'YOR282W'; 'YOR287C'; 'YOR294W'; 'YOR310C'; 'YOR319W'; 'YOR326W'; 'YOR329
C'; 'YOR335C'; 'YOR336W'; 'YOR340C'; 'YOR341W'; 'YOR353C'; 'YOR361C'; 'YOR362C'; 'YOR370C'; 'YOR372
C'; 'YOR373W'; 'YPL007C'; 'YPL010W'; 'YPL011C'; 'YPL012W'; 'YPL016W'; 'YPL020C'; 'YPL028W'; 'YPL043
W'; 'YPL044C'; 'YPL063W'; 'YPL076W'; 'YPL082C'; 'YPL083C'; 'YPL085W'; 'YPL093W'; 'YPL094C'; 'YPL117
C'; 'YPL122C'; 'YPL124W'; 'YPL126W'; 'YPL128C'; 'YPL131W'; 'YPL142C'; 'YPL143W'; 'YPL146C'; 'YPL151
C'; 'YPL153C'; 'YPL160W'; 'YPL169C'; 'YPL175W'; 'YPL190C'; 'YPL204W'; 'YPL209C'; 'YPL210C'; 'YPL211
W'; 'YPL217C'; 'YPL218W'; 'YPL228W'; 'YPL231W'; 'YPL233W'; 'YPL235W'; 'YPL237W'; 'YPL238C'; 'YPL242
C'; 'YPL243W'; 'YPL251W'; 'YPL252C'; 'YPL255W'; 'YPL266W'; 'YPR010C'; 'YPR016C'; 'YPR019W'; 'YPR025
C'; 'YPR033C'; 'YPR034W'; 'YPR035W'; 'YPR041W'; 'YPR048W'; 'YPR055W'; 'YPR056W'; 'YPR082C'; 'YPR085
C'; 'YPR086W'; 'YPR088C'; 'YPR094W'; 'YPR103W'; 'YPR104C'; 'YPR105C'; 'YPR107C'; 'YPR108W'; 'YPR110
C'; 'YPR112C'; 'YPR113W'; 'YPR133C'; 'YPR136C'; 'YPR137W'; 'YPR142C'; 'YPR143W'; 'YPR144C'; 'YPR161
C'; 'YPR162C'; 'YPR165W'; 'YPR168W'; 'YPR169W'; 'YPR175W'; 'YPR176C'; 'YPR177C'; 'YPR178W'; 'YPR180
W'; 'YPR181C'; 'YPR182W'; 'YPR183W'; 'YPR186C'; 'YPR187W'; 'YPR190C'; ...
    %'YCL004W';... %removed by HA 2/7/2013 - doi: 10.1074/jbc.273.16.9829
    %'YKL192C';... %removed by HA 2/7/2013 - http://dx.doi.org/10.1016/j.bbaliip.
2006.07.004
    };

```

end

```
function genes = auxotrophicORFs
```

```

% list of 432 auxotrophic ORFs (669 annotated auxotroph minus 52 on YKO
% essential list minus 87 which are re either temp-sensitive ino
% auxotrophs or not auxotrophs in the nature study):

```

```

genes=
{ 'YAL021C'; 'YAL024C'; 'YAL026C'; 'YAL040C'; 'YAL051W'; 'YAL056W'; 'YAL058W'; 'YAR003W'; 'YAR015W'
; 'YAR069W-A'; 'YAR070W-A'; 'YBL027W'; 'YBL033C'; 'YBL047C'; 'YBL058W'; 'YBL061C'; 'YBL091C-
A'; 'YBL102W'; 'YBL103C'; 'YBR015C'; 'YBR058C'; 'YBR077C'; 'YBR106W'; 'YBR107C'; 'YBR115C'; 'YBR126
C'; 'YBR127C'; 'YBR133C'; 'YBR175W'; 'YBR176W'; 'YBR189W'; 'YBR191W'; 'YBR248C'; 'YBR272C'; 'YBR279
W'; 'YCL018W'; 'YCL030C'; 'YCL032W'; 'YCL033C'; 'YCL045C'; 'YCR021C'; 'YCR045C'; 'YCR047C'; 'YCR053
W'; 'YCR076C'; 'YCR089W'; 'YCR094W'; 'YDL001W'; 'YDL002C'; 'YDL006W'; 'YDL010W'; 'YDL020C'; 'YDL021
W'; 'YDL033C'; 'YDL040C'; 'YDL048C'; 'YDL069C'; 'YDL073W'; 'YDL074C'; 'YDL077C'; 'YDL081C'; 'YDL083
C'; 'YDL106C'; 'YDL130W'; 'YDL173W'; 'YDL190C'; 'YDL191W'; 'YDL192W'; 'YDL194W'; 'YDL201W'; 'YDL203
C'; 'YDR007W'; 'YDR043C'; 'YDR049W'; 'YDR057W'; 'YDR071C'; 'YDR074W'; 'YDR080W'; 'YDR138W'; 'YDR162
C'; 'YDR173C'; 'YDR174W'; 'YDR176W'; 'YDR200C'; 'YDR226W'; 'YDR260C'; 'YDR266C'; 'YDR276C'; 'YDR277
C'; 'YDR283C'; 'YDR289C'; 'YDR335W'; 'YDR346C'; 'YDR348C'; 'YDR351W'; 'YDR354W'; 'YDR358W'; 'YDR363
W'; 'YDR379W'; 'YDR385W'; 'YDR389W'; 'YDR392W'; 'YDR395W'; 'YDR411C'; 'YDR422C'; 'YDR432W'; 'YDR439
W'; 'YDR448W'; 'YDR469W'; 'YDR477W'; 'YDR482C'; 'YDR486C'; 'YDR540C'; 'YEL004W'; 'YEL013W'; 'YEL021
W'; 'YEL027W'; 'YEL031W'; 'YEL037C'; 'YEL040W'; 'YEL044W'; 'YEL048C'; 'YEL051W'; 'YER001W'; 'YER007
C-
A'; 'YER026C'; 'YER027C'; 'YER052C'; 'YER055C'; 'YER059W'; 'YER069W'; 'YER083C'; 'YER090W'; 'YER091
C'; 'YER092W'; 'YER095W'; 'YER101C'; 'YER116C'; 'YER118C'; 'YER120W'; 'YER122C'; 'YER129W'; 'YER130
C'; 'YER149C'; 'YER150W'; 'YER167W'; 'YER169W'; 'YER177W'; 'YFL013C'; 'YFL031W'; 'YFR010W'; 'YFR025
C'; 'YFR040W'; 'YFR048W'; 'YGL009C'; 'YGL012W'; 'YGL020C'; 'YGL025C'; 'YGL026C'; 'YGL031C'; 'YGL049
C'; 'YGL054C'; 'YGL058W'; 'YGL060W'; 'YGL066W'; 'YGL070C'; 'YGL115W'; 'YGL126W'; 'YGL127C'; 'YGL154
C'; 'YGL167C'; 'YGL168W'; 'YGL175C'; 'YGL179C'; 'YGL180W'; 'YGL181W'; 'YGL203C'; 'YGL211W'; 'YGL219
C'; 'YGL234W'; 'YGL244W'; 'YGR014W'; 'YGR020C'; 'YGR056W'; 'YGR057C'; 'YGR061C'; 'YGR063C'; 'YGR092
W'; 'YGR104C'; 'YGR105W'; 'YGR108W'; 'YGR135W'; 'YGR144W'; 'YGR162W'; 'YGR166W'; 'YGR204W'; 'YGR223
C'; 'YGR227W'; 'YGR229C'; 'YGR241C'; 'YGR250C'; 'YGR252W'; 'YHR010W'; 'YHR013C'; 'YHR018C'; 'YHR025
W'; 'YHR026W'; 'YHR030C'; 'YHR038W'; 'YHR060W'; 'YHR079C'; 'YHR111W'; 'YHR142W'; 'YHR162W'; 'YHR178
W'; 'YHR179W'; 'YHR199C'; 'YHR206W'; 'YHR208W'; 'YIL017C'; 'YIL020C'; 'YIL027C'; 'YIL029C'; 'YIL036
W'; 'YIL044C'; 'YIL072W'; 'YIL077C'; 'YIL105C'; 'YIL116W'; 'YIL119C'; 'YIL128W'; 'YIL153W'; 'YIR017
C'; 'YIR034C'; 'YJL088W'; 'YJL095W'; 'YJL115W'; 'YJL117W'; 'YJL128C'; 'YJL130C'; 'YJL140W'; 'YJL151
C'; 'YJL153C'; 'YJL158C'; 'YJL172W'; 'YJL192C'; 'YJL193W'; 'YJL204C'; 'YJL208C'; 'YJR066W'; 'YJR075
W'; 'YJR083C'; 'YJR104C'; 'YJR122W'; 'YKL001C'; 'YKL006W'; 'YKL027W'; 'YKL032C'; 'YKL048C'; 'YKL053

```

```

C-  

A'; 'YKL056C'; 'YKL064W'; 'YKL077W'; 'YKL079W'; 'YKL119C'; 'YKL121W'; 'YKL160W'; 'YKL176C'; 'YKL190  

W'; 'YKL211C'; 'YKL213C'; 'YKL216W'; 'YKR007W'; 'YKR026C'; 'YKR036C'; 'YKR070W'; 'YKR099W'; 'YLL019  

C'; 'YLL021W'; 'YLL027W'; 'YLL039C'; 'YLR015W'; 'YLR016C'; 'YLR021W'; 'YLR048W'; 'YLR055C'; 'YLR061  

W'; 'YLR074C'; 'YLR079W'; 'YLR087C'; 'YLR113W'; 'YLR150W'; 'YLR192C'; 'YLR199C'; 'YLR226W'; 'YLR242  

C'; 'YLR262C'; 'YLR268W'; 'YLR292C'; 'YLR315W'; 'YLR320W'; 'YLR324W'; 'YLR332W'; 'YLR357W'; 'YLR371  

W'; 'YLR373C'; 'YLR396C'; 'YLR417W'; 'YLR418C'; 'YLR420W'; 'YLR426W'; 'YLR436C'; 'YML008C'; 'YML013  

W'; 'YML014W'; 'YML028W'; 'YML034W'; 'YML055W'; 'YML071C'; 'YML103C'; 'YML115C'; 'YML117W'; 'YMR010  

W'; 'YMR014W'; 'YMR016C'; 'YMR029C'; 'YMR038C'; 'YMR052W'; 'YMR062C'; 'YMR067C'; 'YMR068W'; 'YMR092  

C'; 'YMR099C'; 'YMR104C'; 'YMR123W'; 'YMR190C'; 'YMR202W'; 'YMR214W'; 'YMR217W'; 'YMR242C'; 'YMR247  

C'; 'YMR276W'; 'YMR300C'; 'YMR304W'; 'YMR307W'; 'YMR312W'; 'YNL003C'; 'YNL041C'; 'YNL051W'; 'YNL079  

C'; 'YNL080C'; 'YNL119W'; 'YNL127W'; 'YNL133C'; 'YNL148C'; 'YNL215W'; 'YNL219C'; 'YNL220W'; 'YNL229  

C'; 'YNL236W'; 'YNL277W'; 'YNL307C'; 'YNL316C'; 'YNL322C'; 'YNR055C'; 'YOL018C'; 'YOL067C'; 'YOL087  

C'; 'YOL090W'; 'YOL093W'; 'YOL098C'; 'YOL107W'; 'YOL109W'; 'YOL111C'; 'YOL116W'; 'YOL121C'; 'YOL122  

C'; 'YOL124C'; 'YOL143C'; 'YOL145C'; 'YOR002W'; 'YOR008C'; 'YOR012W'; 'YOR067C'; 'YOR070C'; 'YOR078  

W'; 'YOR096W'; 'YOR106W'; 'YOR123C'; 'YOR128C'; 'YOR189W'; 'YOR202W'; 'YOR216C'; 'YOR246C'; 'YOR290  

C'; 'YOR320C'; 'YOR322C'; 'YOR359W'; 'YOR371C'; 'YPL055C'; 'YPL065W'; 'YPL089C'; 'YPL138C'; 'YPL140  

C'; 'YPL144W'; 'YPL157W'; 'YPL159C'; 'YPL174C'; 'YPL177C'; 'YPL226W'; 'YPL241C'; 'YPL254W'; 'YPL264  

C'; 'YPR036W'; 'YPR043W'; 'YPR060C'; 'YPR067W'; 'YPR139C'; 'YPR167C'; 'YPR173C'; 'YPR179C'; 'YPR201  

W'; ...  

  'YDR158W';... %added by BH 10/10/12 from SGD annotation  

  'YDR408C';... %added by BH 10/10/12 from SGD annotation  

  'YFR030W';... %added by BH 10/10/12 from SGD annotation  

  'YJR137C';... %added by BH 10/10/12 from SGD annotation  

  %'YBL098W';... %removed by BH 10/11/12 - per SGD, auxotroph in W303, not S288C  

  %'YDL131W';... %removed by BH 10/11/12 - per SGD, auxotrophy is only observed during  

respiratory growth in non S288C strain  

  %'YFR047C';... %removed by BH 10/11/12 - per SGD, auxotroph in W303, not S288C  

  %'YKL212W';... %removed by BH 10/11/12 - per SGD, auxotroph not in S288C  

  %'YNL241C';... %removed by BH 10/11/12 - per SGD, auxotroph not in S288C  

  'YDR234W';... %added by BH 10/15/12 - based on PMID: 5908136 - poor evidence, and  

2507177. I am gaining confidence that amino acid defects are masked in YKO strains by  

auxotrophy (similarly, I suspect "false negatives" YBR166C, YDR127W, YGL148W, YIL094C,  

YOL140W (?))  

  'YJR139C';... %added by BH 10/15/12 - based on PMID: 4380684 - as above, poor  

evidence, but reasonable  

  'YNL280C';... %added by BH 10/15/12 - this one is quite a puzzle. Grows aerobically on  

defined media, but not complex media. See PMID 8631695  

  'YNR050C';... %added by bh 10/15/12 - PMID 6429126 describes it as a lysine auxotroph  

(not sure if strain specific)  

  'YOL058W';... %added by bh 10/15/12 - PMID 19346356 "strains Arg1, Arg3, and Arg4 are  

arginine auxotrophic due to defects in arginine biosynthesis"  

  % 'YDR300C';... %added by bh 10/15/12 - per SGD, pro1, pro2, pro3 are auxotrophs  

however: "A unique property of all the pro mutant strains is that they cannot grow on  

standard YPD rich media."  

  % 'YOR323C';... %added by bh 10/15/12 - per SGD, pro1, pro2, pro3 are auxotrophs  

however: "A unique property of all the pro mutant strains is that they cannot grow on  

standard YPD rich media."  

  % 'YER023W';...%added by bh 10/15/12 - per SGD, pro1, pro2, pro3 are auxotrophs  

however: "A unique property of all the pro mutant strains is that they cannot grow on  

standard YPD rich media."  

  'YIL094C';... %added by bh 10/26/12 - PMID 6026248  

  'YGL080W';... %added by bh 11/1/12 - PMID 22628554, a leucine and valine auxotroph  

  'YHR162W';... %added by bh 11/1/12 - PMID 22628554, a leucine and valine auxotroph  

  'YMR289W';... %added by bh 12/7/12 - PMID 17873082, required for growth in media  

lacking p-aminobenzoic or folic acid and encoded a 4-amino-4-deoxychorismate lyase, which  

is the last of the three enzymatic activities required for p-aminobenzoic acid  

biosynthesis  

  'YAL012W';... %added by bh 12/7/12 - per SGD, cysteine auxotroph  

  'YER086W';... %added by bh 12/7/12 - per SGD, isoleucine auxotroph

```

```

'YGR155W';... %added by bh 12/7/12 - per SGD, cysteine auxotroph
'YLR304C';... %added by bh 12/7/12 - per SGD, mutation leads to glutamate auxotrophy
'YBR252W';... %added by bh 12/11/12 - per SGD, mutation leads to dTMP auxotrophy
'YDL205C';... %added by bh 12/11/12 - per SGD, mutation leads to heme auxotrophy
'YDR047W';... %added by bh 12/11/12 - per SGD, mutation leads to heme auxotrophy
'YDR232W';... %added by bh 12/11/12 - per SGD, mutation leads to heme auxotrophy
%'YFR019W';... %removed by BH 12/11/12 - temp sensitive inositol auxotroph
'YGL040C';... %added by bh 12/11/12 - per SGD, mutation leads to heme auxotrophy
%'YGL062W';... %removed by BH 12/11/12 - temp sensitive inositol auxotroph
'YGR065C';... %added by bh 12/11/12 - per SGD, mutation leads to fatty acid auxotrophy
'YGR267C';... %added by bh 12/11/12 - per SGD, mutation leads to folinic acid
auxotrophy
'YHR128W';... %added by bh 12/11/12 - per SGD, mutation leads to uracil and uridine
auxotrophy
'YMR113W';... %added by bh 12/11/12 - per SGD, mutation leads to folinic acid
auxotrophy
'YNL256W';... %added by bh 12/11/12 - per SGD, mutation leads to folic acid auxotrophy
'YOR278W';... %added by bh 12/11/12 - per SGD, mutation leads to heme auxotrophy
'YGL055W';... %added by bh 12/13/12 - per SGD, mutation leads to oleic acid auxotrophy
(probably monounsaturated fatty acids in general)
%'YER152C';... %removed by BH 1/8/13 - temp sensitive inositol auxotroph
%'YMR165C';... %removed by HA 2/5/13 - auxotrophy is due to overexpression, not
deletion.
%'YEL029C';... %removed by bh 2/5/13 - temp dependent inositol auxotroph
'YBR166C';... %added by bh 2/7/13 - tyrosine auxotroph PMID: 1943992 - ref
surprisingly hard to find, since the gene is "Tyrosine Requiring"
'YLR303W';... %added by bh 2/7/13 - methionine auxotroph PMIDs: 4364332, 1101032
};
end

function genes = verifiedORFs

% list of 4992 verified ORFs taken from SGD (6 Feb 2013)
% http://www.yeastgenome.org/cgi-bin/search/featureSearch?
featuretype=ORF&qualifier=Verified
% Note: this still includes some ORFs with "dubious" function

genes =
{'Q0045'; 'Q0050'; 'Q0055'; 'Q0060'; 'Q0065'; 'Q0070'; 'Q0080'; 'Q0085'; 'Q0105'; 'Q0110'; 'Q0115'; '
Q0120'; 'Q0130'; 'Q0140'; 'Q0160'; 'Q0250'; 'Q0275'; 'R0010W'; 'R0020C'; 'R0030W'; 'R0040C'; 'YAL001
C'; 'YAL002W'; 'YAL003W'; 'YAL005C'; 'YAL007C'; 'YAL008W'; 'YAL009W'; 'YAL010C'; 'YAL011W'; 'YAL012
W'; 'YAL013W'; 'YAL014C'; 'YAL015C'; 'YAL016W'; 'YAL017W'; 'YAL019W'; 'YAL020C'; 'YAL021C'; 'YAL022
C'; 'YAL023C'; 'YAL024C'; 'YAL025C'; 'YAL026C'; 'YAL027W'; 'YAL028W'; 'YAL029C'; 'YAL030W'; 'YAL031
C'; 'YAL032C'; 'YAL033W'; 'YAL034C'; 'YAL034W-
A'; 'YAL035W'; 'YAL036C'; 'YAL038W'; 'YAL039C'; 'YAL040C'; 'YAL041W'; 'YAL042W'; 'YAL043C'; 'YAL044
C'; 'YAL046C'; 'YAL047C'; 'YAL048C'; 'YAL049C'; 'YAL051W'; 'YAL053W'; 'YAL054C'; 'YAL055W'; 'YAL056
W'; 'YAL058W'; 'YAL059W'; 'YAL060W'; 'YAL062W'; 'YAL063C'; 'YAL064W'; 'YAL067C'; 'YAL068C'; 'YAR002
C-
A'; 'YAR002W'; 'YAR003W'; 'YAR007C'; 'YAR008W'; 'YAR014C'; 'YAR015W'; 'YAR018C'; 'YAR019C'; 'YAR020
C'; 'YAR027W'; 'YAR031W'; 'YAR033W'; 'YAR035W'; 'YAR042W'; 'YAR050W'; 'YAR071W'; 'YBL001C'; 'YBL002
W'; 'YBL003C'; 'YBL004W'; 'YBL005W'; 'YBL006C'; 'YBL007C'; 'YBL008W'; 'YBL009W'; 'YBL011W'; 'YBL013
W'; 'YBL014C'; 'YBL015W'; 'YBL016W'; 'YBL017C'; 'YBL018C'; 'YBL019W'; 'YBL020W'; 'YBL021C'; 'YBL022
C'; 'YBL023C'; 'YBL024W'; 'YBL025W'; 'YBL026W'; 'YBL027W'; 'YBL028C'; 'YBL030C'; 'YBL031W'; 'YBL032
W'; 'YBL033C'; 'YBL034C'; 'YBL035C'; 'YBL036C'; 'YBL037W'; 'YBL038W'; 'YBL039C'; 'YBL040C'; 'YBL041
W'; 'YBL042C'; 'YBL043W'; 'YBL045C'; 'YBL046W'; 'YBL047C'; 'YBL049W'; 'YBL050W'; 'YBL051C'; 'YBL052
C'; 'YBL054W'; 'YBL055C'; 'YBL056W'; 'YBL057C'; 'YBL058W'; 'YBL059C-
A'; 'YBL060W'; 'YBL061C'; 'YBL063W'; 'YBL064C'; 'YBL066C'; 'YBL067C'; 'YBL068W'; 'YBL069W'; 'YBL071
W-
A'; 'YBL072C'; 'YBL074C'; 'YBL075C'; 'YBL076C'; 'YBL078C'; 'YBL079W'; 'YBL080C'; 'YBL082C'; 'YBL084
C'; 'YBL085W'; 'YBL087C'; 'YBL088C'; 'YBL089W'; 'YBL090W'; 'YBL091C'; 'YBL091C-

```

A'; 'YBL092W'; 'YBL093C'; 'YBL097W'; 'YBL098W'; 'YBL099W'; 'YBL101C'; 'YBL102W'; 'YBL103C'; 'YBL104  
C'; 'YBL105C'; 'YBL106C'; 'YBL107C'; 'YBL108C-  
A'; 'YBR001C'; 'YBR002C'; 'YBR003W'; 'YBR004C'; 'YBR005W'; 'YBR006W'; 'YBR008C'; 'YBR009C'; 'YBR010  
W'; 'YBR011C'; 'YBR014C'; 'YBR015C'; 'YBR016W'; 'YBR017C'; 'YBR018C'; 'YBR019C'; 'YBR020W'; 'YBR021  
W'; 'YBR022W'; 'YBR023C'; 'YBR024W'; 'YBR025C'; 'YBR026C'; 'YBR028C'; 'YBR029C'; 'YBR030W'; 'YBR031  
W'; 'YBR034C'; 'YBR035C'; 'YBR036C'; 'YBR037C'; 'YBR038W'; 'YBR039W'; 'YBR040W'; 'YBR041W'; 'YBR042  
C'; 'YBR043C'; 'YBR044C'; 'YBR045C'; 'YBR046C'; 'YBR048W'; 'YBR049C'; 'YBR050C'; 'YBR052C'; 'YBR054  
W'; 'YBR055C'; 'YBR056W'; 'YBR057C'; 'YBR058C'; 'YBR058C-  
A'; 'YBR059C'; 'YBR060C'; 'YBR061C'; 'YBR065C'; 'YBR066C'; 'YBR067C'; 'YBR068C'; 'YBR069C'; 'YBR070  
C'; 'YBR071W'; 'YBR072W'; 'YBR073W'; 'YBR076W'; 'YBR077C'; 'YBR078W'; 'YBR079C'; 'YBR080C'; 'YBR081  
C'; 'YBR082C'; 'YBR083W'; 'YBR084C-  
A'; 'YBR084W'; 'YBR085W'; 'YBR086C'; 'YBR087W'; 'YBR088C'; 'YBR089C-  
A'; 'YBR091C'; 'YBR092C'; 'YBR093C'; 'YBR094W'; 'YBR095C'; 'YBR097W'; 'YBR098W'; 'YBR101C'; 'YBR102  
C'; 'YBR103W'; 'YBR104W'; 'YBR105C'; 'YBR106W'; 'YBR107C'; 'YBR108W'; 'YBR109C'; 'YBR110W'; 'YBR111  
C'; 'YBR111W-  
A'; 'YBR112C'; 'YBR114W'; 'YBR115C'; 'YBR117C'; 'YBR118W'; 'YBR119W'; 'YBR120C'; 'YBR121C'; 'YBR122  
C'; 'YBR123C'; 'YBR125C'; 'YBR126C'; 'YBR127C'; 'YBR128C'; 'YBR129C'; 'YBR130C'; 'YBR131W'; 'YBR132  
C'; 'YBR133C'; 'YBR135W'; 'YBR136W'; 'YBR137W'; 'YBR139W'; 'YBR140C'; 'YBR142W'; 'YBR143C'; 'YBR145  
W'; 'YBR146W'; 'YBR147W'; 'YBR148W'; 'YBR149W'; 'YBR150C'; 'YBR151W'; 'YBR152W'; 'YBR153W'; 'YBR154  
C'; 'YBR155W'; 'YBR156C'; 'YBR157C'; 'YBR158W'; 'YBR159W'; 'YBR160W'; 'YBR161W'; 'YBR162C'; 'YBR162  
W-  
A'; 'YBR163W'; 'YBR164C'; 'YBR165W'; 'YBR166C'; 'YBR167C'; 'YBR168W'; 'YBR169C'; 'YBR170C'; 'YBR171  
W'; 'YBR172C'; 'YBR173C'; 'YBR175W'; 'YBR176W'; 'YBR177C'; 'YBR179C'; 'YBR180W'; 'YBR181C'; 'YBR182  
C'; 'YBR183W'; 'YBR185C'; 'YBR186W'; 'YBR188C'; 'YBR189W'; 'YBR191W'; 'YBR192W'; 'YBR193C'; 'YBR194  
W'; 'YBR195C'; 'YBR196C'; 'YBR198C'; 'YBR199W'; 'YBR200W'; 'YBR201W'; 'YBR202W'; 'YBR203W'; 'YBR204  
C'; 'YBR205W'; 'YBR207W'; 'YBR208C'; 'YBR210W'; 'YBR211C'; 'YBR212W'; 'YBR213W'; 'YBR214W'; 'YBR215  
W'; 'YBR216C'; 'YBR217W'; 'YBR218C'; 'YBR221C'; 'YBR222C'; 'YBR223C'; 'YBR227C'; 'YBR228W'; 'YBR229  
C'; 'YBR230C'; 'YBR231C'; 'YBR233W'; 'YBR233W-  
A'; 'YBR234C'; 'YBR235W'; 'YBR236C'; 'YBR237W'; 'YBR238C'; 'YBR240C'; 'YBR243C'; 'YBR244W'; 'YBR245  
C'; 'YBR246W'; 'YBR247C'; 'YBR248C'; 'YBR249C'; 'YBR250W'; 'YBR251W'; 'YBR252W'; 'YBR253W'; 'YBR254  
C'; 'YBR255W'; 'YBR256C'; 'YBR257W'; 'YBR258C'; 'YBR260C'; 'YBR261C'; 'YBR262C'; 'YBR263W'; 'YBR264  
C'; 'YBR265W'; 'YBR267W'; 'YBR268W'; 'YBR271W'; 'YBR272C'; 'YBR273C'; 'YBR274W'; 'YBR275C'; 'YBR276  
C'; 'YBR278W'; 'YBR279W'; 'YBR280C'; 'YBR281C'; 'YBR282W'; 'YBR283C'; 'YBR286W'; 'YBR288C'; 'YBR289  
W'; 'YBR290W'; 'YBR291C'; 'YBR293W'; 'YBR294W'; 'YBR295W'; 'YBR296C'; 'YBR297W'; 'YBR298C'; 'YBR299  
W'; 'YBR301W'; 'YBR302C'; 'YCL001W'; 'YCL004W'; 'YCL005W'; 'YCL005W-  
A'; 'YCL008C'; 'YCL009C'; 'YCL010C'; 'YCL011C'; 'YCL012C'; 'YCL014W'; 'YCL016C'; 'YCL017C'; 'YCL018  
W'; 'YCL024W'; 'YCL025C'; 'YCL026C-  
A'; 'YCL027W'; 'YCL028W'; 'YCL029C'; 'YCL030C'; 'YCL031C'; 'YCL032W'; 'YCL033C'; 'YCL034W'; 'YCL035  
C'; 'YCL036W'; 'YCL037C'; 'YCL038C'; 'YCL039W'; 'YCL040W'; 'YCL043C'; 'YCL044C'; 'YCL045C'; 'YCL047  
C'; 'YCL048W'; 'YCL050C'; 'YCL051W'; 'YCL052C'; 'YCL054W'; 'YCL055W'; 'YCL056C'; 'YCL057C-  
A'; 'YCL057W'; 'YCL058C'; 'YCL058W-  
A'; 'YCL059C'; 'YCL061C'; 'YCL063W'; 'YCL064C'; 'YCL066W'; 'YCL067C'; 'YCL069W'; 'YCL073C'; 'YCR002  
C'; 'YCR003W'; 'YCR004C'; 'YCR005C'; 'YCR008W'; 'YCR009C'; 'YCR010C'; 'YCR011C'; 'YCR012W'; 'YCR014  
C'; 'YCR017C'; 'YCR018C'; 'YCR019W'; 'YCR020C'; 'YCR020C-A'; 'YCR020W-  
B'; 'YCR021C'; 'YCR023C'; 'YCR024C'; 'YCR024C-A'; 'YCR026C'; 'YCR027C'; 'YCR028C'; 'YCR028C-  
A'; 'YCR030C'; 'YCR031C'; 'YCR032W'; 'YCR033W'; 'YCR034W'; 'YCR035C'; 'YCR036W'; 'YCR037C'; 'YCR038  
C'; 'YCR039C'; 'YCR040W'; 'YCR042C'; 'YCR044C'; 'YCR045C'; 'YCR046C'; 'YCR047C'; 'YCR048W'; 'YCR052  
W'; 'YCR053W'; 'YCR054C'; 'YCR057C'; 'YCR059C'; 'YCR060W'; 'YCR063W'; 'YCR065W'; 'YCR066W'; 'YCR067  
C'; 'YCR068W'; 'YCR069W'; 'YCR071C'; 'YCR072C'; 'YCR073C'; 'YCR073W-  
A'; 'YCR075C'; 'YCR076C'; 'YCR077C'; 'YCR079W'; 'YCR081W'; 'YCR082W'; 'YCR083W'; 'YCR084C'; 'YCR086  
W'; 'YCR088W'; 'YCR089W'; 'YCR091W'; 'YCR092C'; 'YCR093W'; 'YCR094W'; 'YCR096C'; 'YCR097W'; 'YCR098  
C'; 'YCR104W'; 'YCR105W'; 'YCR106W'; 'YCR107W'; 'YDL001W'; 'YDL002C'; 'YDL003W'; 'YDL004W'; 'YDL005  
C'; 'YDL006W'; 'YDL007W'; 'YDL008W'; 'YDL010W'; 'YDL012C'; 'YDL013W'; 'YDL014W'; 'YDL015C'; 'YDL017  
W'; 'YDL018C'; 'YDL019C'; 'YDL020C'; 'YDL021W'; 'YDL022W'; 'YDL024C'; 'YDL025C'; 'YDL028C'; 'YDL029  
W'; 'YDL030W'; 'YDL031W'; 'YDL033C'; 'YDL035C'; 'YDL036C'; 'YDL037C'; 'YDL039C'; 'YDL040C'; 'YDL042  
C'; 'YDL043C'; 'YDL044C'; 'YDL045C'; 'YDL045W-  
A'; 'YDL046W'; 'YDL047W'; 'YDL048C'; 'YDL049C'; 'YDL051W'; 'YDL052C'; 'YDL053C'; 'YDL054C'; 'YDL055  
C'; 'YDL056W'; 'YDL058W'; 'YDL059C'; 'YDL060W'; 'YDL061C'; 'YDL063C'; 'YDL064W'; 'YDL065C'; 'YDL066  
W'; 'YDL067C'; 'YDL069C'; 'YDL070W'; 'YDL072C'; 'YDL074C'; 'YDL075W'; 'YDL076C'; 'YDL077C'; 'YDL078  
C'; 'YDL079C'; 'YDL080C'; 'YDL081C'; 'YDL082W'; 'YDL083C'; 'YDL084W'; 'YDL085W'; 'YDL087C'; 'YDL088

C'; 'YDL089W'; 'YDL090C'; 'YDL091C'; 'YDL092W'; 'YDL093W'; 'YDL095W'; 'YDL097C'; 'YDL098C'; 'YDL099  
W'; 'YDL100C'; 'YDL101C'; 'YDL102W'; 'YDL103C'; 'YDL104C'; 'YDL105W'; 'YDL106C'; 'YDL107W'; 'YDL108  
W'; 'YDL110C'; 'YDL111C'; 'YDL112W'; 'YDL113C'; 'YDL115C'; 'YDL116W'; 'YDL117W'; 'YDL120W'; 'YDL122  
W'; 'YDL123W'; 'YDL124W'; 'YDL125C'; 'YDL126C'; 'YDL127W'; 'YDL128W'; 'YDL130W'; 'YDL130W-  
A'; 'YDL131W'; 'YDL132W'; 'YDL133C-  
A'; 'YDL133W'; 'YDL134C'; 'YDL135C'; 'YDL136W'; 'YDL137W'; 'YDL138W'; 'YDL139C'; 'YDL140C'; 'YDL141  
W'; 'YDL142C'; 'YDL143W'; 'YDL145C'; 'YDL146W'; 'YDL147W'; 'YDL148C'; 'YDL149W'; 'YDL150W'; 'YDL153  
C'; 'YDL154W'; 'YDL155W'; 'YDL156W'; 'YDL159W'; 'YDL160C'; 'YDL160C-  
A'; 'YDL161W'; 'YDL164C'; 'YDL165W'; 'YDL166C'; 'YDL167C'; 'YDL168W'; 'YDL169C'; 'YDL170W'; 'YDL171  
C'; 'YDL173W'; 'YDL174C'; 'YDL175C'; 'YDL176W'; 'YDL178W'; 'YDL179W'; 'YDL181W'; 'YDL182W'; 'YDL183  
C'; 'YDL184C'; 'YDL185W'; 'YDL188C'; 'YDL189W'; 'YDL190C'; 'YDL191W'; 'YDL192W'; 'YDL193W'; 'YDL194  
W'; 'YDL195W'; 'YDL197C'; 'YDL198C'; 'YDL200C'; 'YDL201W'; 'YDL202W'; 'YDL203C'; 'YDL204W'; 'YDL205  
C'; 'YDL207W'; 'YDL208W'; 'YDL209C'; 'YDL210W'; 'YDL212W'; 'YDL213C'; 'YDL214C'; 'YDL215C'; 'YDL216  
C'; 'YDL217C'; 'YDL219W'; 'YDL220C'; 'YDL222C'; 'YDL223C'; 'YDL224C'; 'YDL225W'; 'YDL226C'; 'YDL227  
C'; 'YDL229W'; 'YDL230W'; 'YDL231C'; 'YDL232W'; 'YDL234C'; 'YDL235C'; 'YDL236W'; 'YDL237W'; 'YDL238  
C'; 'YDL239C'; 'YDL240W'; 'YDL243C'; 'YDL244W'; 'YDL245C'; 'YDL247W'; 'YDL248W'; 'YDR001C'; 'YDR002  
W'; 'YDR003W'; 'YDR004W'; 'YDR005C'; 'YDR006C'; 'YDR007W'; 'YDR009W'; 'YDR011W'; 'YDR012W'; 'YDR013  
W'; 'YDR014W'; 'YDR014W-  
A'; 'YDR016C'; 'YDR017C'; 'YDR019C'; 'YDR021W'; 'YDR022C'; 'YDR023W'; 'YDR025W'; 'YDR026C'; 'YDR027  
C'; 'YDR028C'; 'YDR030C'; 'YDR031W'; 'YDR032C'; 'YDR033W'; 'YDR034C'; 'YDR035W'; 'YDR036C'; 'YDR037  
W'; 'YDR038C'; 'YDR039C'; 'YDR040C'; 'YDR041W'; 'YDR043C'; 'YDR044W'; 'YDR045C'; 'YDR046C'; 'YDR047  
W'; 'YDR049W'; 'YDR050C'; 'YDR051C'; 'YDR052C'; 'YDR054C'; 'YDR055W'; 'YDR057W'; 'YDR058C'; 'YDR059  
C'; 'YDR060W'; 'YDR062W'; 'YDR063W'; 'YDR064W'; 'YDR065W'; 'YDR068W'; 'YDR069C'; 'YDR071C'; 'YDR072  
C'; 'YDR073W'; 'YDR074W'; 'YDR075W'; 'YDR076W'; 'YDR077W'; 'YDR078C'; 'YDR079C-  
A'; 'YDR079W'; 'YDR080W'; 'YDR081C'; 'YDR082W'; 'YDR083W'; 'YDR084C'; 'YDR085C'; 'YDR086C'; 'YDR087  
C'; 'YDR088C'; 'YDR091C'; 'YDR092W'; 'YDR093W'; 'YDR096W'; 'YDR097C'; 'YDR098C'; 'YDR099W'; 'YDR100  
W'; 'YDR101C'; 'YDR103W'; 'YDR104C'; 'YDR105C'; 'YDR106W'; 'YDR107C'; 'YDR108W'; 'YDR110W'; 'YDR113  
C'; 'YDR116C'; 'YDR117C'; 'YDR118W'; 'YDR119W-  
A'; 'YDR120C'; 'YDR121W'; 'YDR122W'; 'YDR123C'; 'YDR125C'; 'YDR126W'; 'YDR127W'; 'YDR128W'; 'YDR129  
C'; 'YDR130C'; 'YDR135C'; 'YDR137W'; 'YDR138W'; 'YDR139C'; 'YDR140W'; 'YDR141C'; 'YDR142C'; 'YDR143  
C'; 'YDR144C'; 'YDR145W'; 'YDR146C'; 'YDR147W'; 'YDR148C'; 'YDR150W'; 'YDR151C'; 'YDR152W'; 'YDR153  
C'; 'YDR155C'; 'YDR156W'; 'YDR158W'; 'YDR159W'; 'YDR160W'; 'YDR162C'; 'YDR163W'; 'YDR164C'; 'YDR165  
W'; 'YDR166C'; 'YDR167W'; 'YDR168W'; 'YDR169C'; 'YDR170C'; 'YDR171W'; 'YDR172W'; 'YDR173C'; 'YDR174  
W'; 'YDR175C'; 'YDR176W'; 'YDR177W'; 'YDR178W'; 'YDR179C'; 'YDR180W'; 'YDR181C'; 'YDR182W'; 'YDR183  
W'; 'YDR184C'; 'YDR185C'; 'YDR186C'; 'YDR188W'; 'YDR189W'; 'YDR190C'; 'YDR191W'; 'YDR192C'; 'YDR194  
C'; 'YDR195W'; 'YDR196C'; 'YDR197W'; 'YDR198C'; 'YDR200C'; 'YDR201W'; 'YDR202C'; 'YDR204W'; 'YDR205  
W'; 'YDR206W'; 'YDR207C'; 'YDR208W'; 'YDR211W'; 'YDR212W'; 'YDR213W'; 'YDR214W'; 'YDR216W'; 'YDR217  
C'; 'YDR218C'; 'YDR219C'; 'YDR221W'; 'YDR223W'; 'YDR224C'; 'YDR225W'; 'YDR226W'; 'YDR227W'; 'YDR228  
C'; 'YDR229W'; 'YDR231C'; 'YDR232W'; 'YDR233C'; 'YDR234W'; 'YDR235W'; 'YDR236C'; 'YDR237W'; 'YDR238  
C'; 'YDR239C'; 'YDR240C'; 'YDR242W'; 'YDR243C'; 'YDR244W'; 'YDR245W'; 'YDR246W'; 'YDR247W'; 'YDR251  
W'; 'YDR252W'; 'YDR253C'; 'YDR254W'; 'YDR255C'; 'YDR256C'; 'YDR257C'; 'YDR258C'; 'YDR259C'; 'YDR260  
C'; 'YDR261C'; 'YDR263C'; 'YDR264C'; 'YDR265W'; 'YDR266C'; 'YDR267C'; 'YDR268W'; 'YDR270W'; 'YDR272  
W'; 'YDR273W'; 'YDR275W'; 'YDR276C'; 'YDR277C'; 'YDR279W'; 'YDR280W'; 'YDR281C'; 'YDR283C'; 'YDR284  
C'; 'YDR285W'; 'YDR287W'; 'YDR288W'; 'YDR289C'; 'YDR291W'; 'YDR292C'; 'YDR293C'; 'YDR294C'; 'YDR295  
C'; 'YDR296W'; 'YDR297W'; 'YDR298C'; 'YDR299W'; 'YDR300C'; 'YDR301W'; 'YDR302W'; 'YDR303C'; 'YDR304  
C'; 'YDR305C'; 'YDR308C'; 'YDR309C'; 'YDR310C'; 'YDR311W'; 'YDR312W'; 'YDR313C'; 'YDR314C'; 'YDR315  
C'; 'YDR316W'; 'YDR317W'; 'YDR318W'; 'YDR320C'; 'YDR320C-A'; 'YDR321W'; 'YDR322C-  
A'; 'YDR322W'; 'YDR323C'; 'YDR324C'; 'YDR325W'; 'YDR326C'; 'YDR328C'; 'YDR329C'; 'YDR330W'; 'YDR331  
W'; 'YDR332W'; 'YDR333C'; 'YDR334W'; 'YDR335W'; 'YDR337W'; 'YDR339C'; 'YDR341C'; 'YDR342C'; 'YDR343  
C'; 'YDR345C'; 'YDR346C'; 'YDR347W'; 'YDR348C'; 'YDR349C'; 'YDR350C'; 'YDR351W'; 'YDR352W'; 'YDR353  
W'; 'YDR354W'; 'YDR356W'; 'YDR358W'; 'YDR359C'; 'YDR361C'; 'YDR362C'; 'YDR363W'; 'YDR363W-  
A'; 'YDR364C'; 'YDR365C'; 'YDR367W'; 'YDR368W'; 'YDR369C'; 'YDR372C'; 'YDR373W'; 'YDR374W-  
A'; 'YDR375C'; 'YDR376W'; 'YDR377W'; 'YDR378C'; 'YDR379C-A'; 'YDR379W'; 'YDR380W'; 'YDR381C-  
A'; 'YDR381W'; 'YDR382W'; 'YDR383C'; 'YDR384C'; 'YDR385W'; 'YDR386W'; 'YDR388W'; 'YDR389W'; 'YDR390  
C'; 'YDR392W'; 'YDR393W'; 'YDR394W'; 'YDR395W'; 'YDR397C'; 'YDR398W'; 'YDR399W'; 'YDR400W'; 'YDR402  
C'; 'YDR403W'; 'YDR404C'; 'YDR405W'; 'YDR406W'; 'YDR407C'; 'YDR408C'; 'YDR409W'; 'YDR410C'; 'YDR411  
C'; 'YDR412W'; 'YDR414C'; 'YDR416W'; 'YDR418W'; 'YDR419W'; 'YDR420W'; 'YDR421W'; 'YDR422C'; 'YDR423  
C'; 'YDR424C'; 'YDR425W'; 'YDR427W'; 'YDR428C'; 'YDR429C'; 'YDR430C'; 'YDR432W'; 'YDR434W'; 'YDR435  
C'; 'YDR436W'; 'YDR437W'; 'YDR438W'; 'YDR439W'; 'YDR440W'; 'YDR441C'; 'YDR443C'; 'YDR446W'; 'YDR447  
C'; 'YDR448W'; 'YDR449C'; 'YDR450W'; 'YDR451C'; 'YDR452W'; 'YDR453C'; 'YDR454C'; 'YDR456W'; 'YDR457



W'; 'YDR458C'; 'YDR459C'; 'YDR460W'; 'YDR461W'; 'YDR462W'; 'YDR463W'; 'YDR464W'; 'YDR465C'; 'YDR466 W'; 'YDR468C'; 'YDR469W'; 'YDR470C'; 'YDR471W'; 'YDR472W'; 'YDR473C'; 'YDR475C'; 'YDR477W'; 'YDR478 W'; 'YDR479C'; 'YDR480W'; 'YDR481C'; 'YDR482C'; 'YDR483W'; 'YDR484W'; 'YDR485C'; 'YDR486C'; 'YDR487 W'; 'YDR488C'; 'YDR489W'; 'YDR490C'; 'YDR492W'; 'YDR493W'; 'YDR494W'; 'YDR495C'; 'YDR496C'; 'YDR497 W'; 'YDR498C'; 'YDR499W'; 'YDR500C'; 'YDR501W'; 'YDR502C'; 'YDR503C'; 'YDR504C'; 'YDR505C'; 'YDR506 W'; 'YDR507C'; 'YDR508C'; 'YDR510W'; 'YDR511W'; 'YDR512C'; 'YDR513W'; 'YDR514C'; 'YDR515W'; 'YDR516 W'; 'YDR517W'; 'YDR518W'; 'YDR519W'; 'YDR522C'; 'YDR523C'; 'YDR524C'; 'YDR525W-  
A'; 'YDR527W'; 'YDR528W'; 'YDR529C'; 'YDR530C'; 'YDR531W'; 'YDR532C'; 'YDR533C'; 'YDR534C'; 'YDR536 W'; 'YDR538W'; 'YDR539W'; 'YDR540C'; 'YDR542W'; 'YDR545W'; 'YEL001C'; 'YEL002C'; 'YEL003W'; 'YEL004 W'; 'YEL005C'; 'YEL006W'; 'YEL007W'; 'YEL009C'; 'YEL011W'; 'YEL012W'; 'YEL013W'; 'YEL015W'; 'YEL016 W'; 'YEL017C-A'; 'YEL017W'; 'YEL018W'; 'YEL019C'; 'YEL020W-  
A'; 'YEL021W'; 'YEL022W'; 'YEL024W'; 'YEL026W'; 'YEL027W'; 'YEL029C'; 'YEL030W'; 'YEL031W'; 'YEL032 W'; 'YEL034W'; 'YEL036C'; 'YEL037C'; 'YEL038W'; 'YEL039C'; 'YEL040W'; 'YEL041W'; 'YEL042W'; 'YEL043 W'; 'YEL044W'; 'YEL046C'; 'YEL047C'; 'YEL048C'; 'YEL049W'; 'YEL050C'; 'YEL051W'; 'YEL052W'; 'YEL053 W'; 'YEL054C'; 'YEL055C'; 'YEL056W'; 'YEL058W'; 'YEL059C-  
A'; 'YEL060C'; 'YEL061C'; 'YEL062W'; 'YEL063C'; 'YEL064C'; 'YEL065W'; 'YEL066W'; 'YEL069C'; 'YEL071 W'; 'YEL072W'; 'YER001W'; 'YER002W'; 'YER003C'; 'YER004W'; 'YER005W'; 'YER006W'; 'YER007C-  
A'; 'YER007W'; 'YER008C'; 'YER009W'; 'YER010C'; 'YER011W'; 'YER012W'; 'YER013W'; 'YER014C-  
A'; 'YER014W'; 'YER015W'; 'YER016W'; 'YER017C'; 'YER018C'; 'YER019C-  
A'; 'YER019W'; 'YER020W'; 'YER021W'; 'YER022W'; 'YER023W'; 'YER024W'; 'YER025W'; 'YER026C'; 'YER027 W'; 'YER028C'; 'YER029C'; 'YER030W'; 'YER031C'; 'YER032W'; 'YER033C'; 'YER035W'; 'YER036C'; 'YER037 W'; 'YER038C'; 'YER039C'; 'YER040W'; 'YER041W'; 'YER042W'; 'YER043C'; 'YER044C'; 'YER044C-  
A'; 'YER045C'; 'YER046W'; 'YER047C'; 'YER048C'; 'YER048W-  
A'; 'YER049W'; 'YER050C'; 'YER051W'; 'YER052C'; 'YER053C'; 'YER054C'; 'YER055C'; 'YER056C'; 'YER056 W'; 'YER057C'; 'YER058W'; 'YER059W'; 'YER060W'; 'YER060W-  
A'; 'YER061C'; 'YER062C'; 'YER063W'; 'YER065C'; 'YER067W'; 'YER068W'; 'YER069W'; 'YER070W'; 'YER072 W'; 'YER073W'; 'YER074W'; 'YER074W-  
A'; 'YER075C'; 'YER078C'; 'YER080W'; 'YER081W'; 'YER082C'; 'YER083C'; 'YER086W'; 'YER087C-  
B'; 'YER087W'; 'YER088C'; 'YER089C'; 'YER089C'; 'YER090W'; 'YER091C'; 'YER092W'; 'YER093C'; 'YER093C-  
A'; 'YER094C'; 'YER095W'; 'YER096W'; 'YER098W'; 'YER099C'; 'YER100W'; 'YER101C'; 'YER102W'; 'YER103 W'; 'YER104W'; 'YER105C'; 'YER106W'; 'YER107C'; 'YER109C'; 'YER110C'; 'YER111C'; 'YER112W'; 'YER113 W'; 'YER114C'; 'YER115C'; 'YER116C'; 'YER117W'; 'YER118C'; 'YER119C'; 'YER120W'; 'YER122C'; 'YER123 W'; 'YER124C'; 'YER125W'; 'YER126C'; 'YER127W'; 'YER128W'; 'YER129W'; 'YER131W'; 'YER132C'; 'YER133 W'; 'YER134C'; 'YER136W'; 'YER139C'; 'YER140W'; 'YER141W'; 'YER142C'; 'YER143W'; 'YER144C'; 'YER145 W'; 'YER146W'; 'YER147C'; 'YER148W'; 'YER149C'; 'YER150W'; 'YER151C'; 'YER152C'; 'YER153C'; 'YER154 W'; 'YER155C'; 'YER157W'; 'YER159C'; 'YER161C'; 'YER162C'; 'YER163C'; 'YER164W'; 'YER165W'; 'YER166 W'; 'YER167W'; 'YER168C'; 'YER169W'; 'YER170W'; 'YER171W'; 'YER172C'; 'YER173W'; 'YER174C'; 'YER175 W'; 'YER176W'; 'YER177W'; 'YER178W'; 'YER179W'; 'YER180C'; 'YER180C-  
A'; 'YER183C'; 'YER185W'; 'YER190W'; 'YFL001W'; 'YFL002C'; 'YFL003C'; 'YFL004W'; 'YFL005W'; 'YFL007 W'; 'YFL008W'; 'YFL009W'; 'YFL010C'; 'YFL010W-  
A'; 'YFL011W'; 'YFL013C'; 'YFL014W'; 'YFL016C'; 'YFL017C'; 'YFL017W-  
A'; 'YFL018C'; 'YFL020C'; 'YFL021W'; 'YFL022C'; 'YFL023W'; 'YFL024C'; 'YFL025C'; 'YFL026W'; 'YFL027 W'; 'YFL028C'; 'YFL029C'; 'YFL030W'; 'YFL031W'; 'YFL033C'; 'YFL034C-A'; 'YFL034C-  
B'; 'YFL036W'; 'YFL037W'; 'YFL038C'; 'YFL039C'; 'YFL041W'; 'YFL044C'; 'YFL045C'; 'YFL047W'; 'YFL048 W'; 'YFL049W'; 'YFL050C'; 'YFL053W'; 'YFL055W'; 'YFL056C'; 'YFL057C'; 'YFL058W'; 'YFL059W'; 'YFL060 W'; 'YFL062W'; 'YFR001W'; 'YFR002W'; 'YFR003C'; 'YFR004W'; 'YFR005C'; 'YFR007W'; 'YFR008W'; 'YFR009 W'; 'YFR010W'; 'YFR011C'; 'YFR012W'; 'YFR013W'; 'YFR014C'; 'YFR015C'; 'YFR016C'; 'YFR017C'; 'YFR019 W'; 'YFR021W'; 'YFR022W'; 'YFR023W'; 'YFR024C-  
A'; 'YFR025C'; 'YFR026C'; 'YFR027W'; 'YFR028C'; 'YFR029W'; 'YFR030W'; 'YFR031C'; 'YFR031C-  
A'; 'YFR032C-  
A'; 'YFR033C'; 'YFR034C'; 'YFR036W'; 'YFR037C'; 'YFR038W'; 'YFR040W'; 'YFR041C'; 'YFR042W'; 'YFR043 W'; 'YFR044C'; 'YFR046C'; 'YFR047C'; 'YFR048W'; 'YFR049W'; 'YFR050C'; 'YFR051C'; 'YFR052W'; 'YFR053 W'; 'YGL001C'; 'YGL002W'; 'YGL003C'; 'YGL004C'; 'YGL005C'; 'YGL006W'; 'YGL008C'; 'YGL009C'; 'YGL011 W'; 'YGL012W'; 'YGL013C'; 'YGL014W'; 'YGL016W'; 'YGL017W'; 'YGL018C'; 'YGL019W'; 'YGL020C'; 'YGL021 W'; 'YGL022W'; 'YGL023C'; 'YGL025C'; 'YGL026C'; 'YGL027C'; 'YGL028C'; 'YGL029W'; 'YGL030W'; 'YGL031 W'; 'YGL032C'; 'YGL033W'; 'YGL035C'; 'YGL037C'; 'YGL038C'; 'YGL039W'; 'YGL040C'; 'YGL043W'; 'YGL044 W'; 'YGL045W'; 'YGL047W'; 'YGL048C'; 'YGL049C'; 'YGL050W'; 'YGL051W'; 'YGL053W'; 'YGL054C'; 'YGL055 W'; 'YGL056C'; 'YGL057C'; 'YGL058W'; 'YGL059W'; 'YGL060W'; 'YGL061C'; 'YGL062W'; 'YGL063W'; 'YGL064 W'; 'YGL065C'; 'YGL066W'; 'YGL067W'; 'YGL068W'; 'YGL070C'; 'YGL071W'; 'YGL073W'; 'YGL075C'; 'YGL076 W'; 'YGL077C'; 'YGL078C'; 'YGL080W'; 'YGL083W'; 'YGL084C'; 'YGL086W'; 'YGL087C'; 'YGL089C'; 'YGL090 W

W'; 'YGL091C'; 'YGL092W'; 'YGL093W'; 'YGL094C'; 'YGL095C'; 'YGL096W'; 'YGL097W'; 'YGL098W'; 'YGL099  
W'; 'YGL100W'; 'YGL103W'; 'YGL104C'; 'YGL105W'; 'YGL106W'; 'YGL107C'; 'YGL110C'; 'YGL111W'; 'YGL112  
C'; 'YGL113W'; 'YGL115W'; 'YGL116W'; 'YGL119W'; 'YGL120C'; 'YGL121C'; 'YGL122C'; 'YGL123W'; 'YGL124  
C'; 'YGL125W'; 'YGL126W'; 'YGL127C'; 'YGL128C'; 'YGL129C'; 'YGL130W'; 'YGL131C'; 'YGL133W'; 'YGL134  
W'; 'YGL135W'; 'YGL136C'; 'YGL137W'; 'YGL139W'; 'YGL141W'; 'YGL142C'; 'YGL143C'; 'YGL144C'; 'YGL145  
W'; 'YGL147C'; 'YGL148W'; 'YGL150C'; 'YGL151W'; 'YGL153W'; 'YGL154C'; 'YGL155W'; 'YGL156W'; 'YGL157  
W'; 'YGL158W'; 'YGL160W'; 'YGL161C'; 'YGL162W'; 'YGL163C'; 'YGL164C'; 'YGL166W'; 'YGL167C'; 'YGL168  
W'; 'YGL169W'; 'YGL170C'; 'YGL171W'; 'YGL172W'; 'YGL173C'; 'YGL174W'; 'YGL175C'; 'YGL178W'; 'YGL179  
C'; 'YGL180W'; 'YGL181W'; 'YGL183C'; 'YGL184C'; 'YGL186C'; 'YGL187C'; 'YGL189C'; 'YGL190C'; 'YGL191  
W'; 'YGL192W'; 'YGL194C'; 'YGL195W'; 'YGL196W'; 'YGL197W'; 'YGL198W'; 'YGL200C'; 'YGL201C'; 'YGL202  
W'; 'YGL203C'; 'YGL205W'; 'YGL206C'; 'YGL207W'; 'YGL208W'; 'YGL209W'; 'YGL210W'; 'YGL211W'; 'YGL212  
W'; 'YGL213C'; 'YGL215W'; 'YGL216W'; 'YGL219C'; 'YGL220W'; 'YGL221C'; 'YGL222C'; 'YGL223C'; 'YGL224  
C'; 'YGL225W'; 'YGL226C-  
A'; 'YGL226W'; 'YGL227W'; 'YGL228W'; 'YGL229C'; 'YGL231C'; 'YGL232W'; 'YGL233W'; 'YGL234W'; 'YGL236  
C'; 'YGL237C'; 'YGL238W'; 'YGL240W'; 'YGL241W'; 'YGL243W'; 'YGL244W'; 'YGL245W'; 'YGL246C'; 'YGL247  
W'; 'YGL248W'; 'YGL249W'; 'YGL250W'; 'YGL251C'; 'YGL252C'; 'YGL253W'; 'YGL254W'; 'YGL255W'; 'YGL256  
W'; 'YGL257C'; 'YGL258W'; 'YGL263W'; 'YGR002C'; 'YGR003W'; 'YGR004W'; 'YGR005C'; 'YGR006W'; 'YGR007  
W'; 'YGR008C'; 'YGR009C'; 'YGR010W'; 'YGR012W'; 'YGR013W'; 'YGR014W'; 'YGR019W'; 'YGR020C'; 'YGR023  
W'; 'YGR024C'; 'YGR027C'; 'YGR028W'; 'YGR029W'; 'YGR030C'; 'YGR031C-  
A'; 'YGR031W'; 'YGR032W'; 'YGR033C'; 'YGR034W'; 'YGR036C'; 'YGR037C'; 'YGR038W'; 'YGR040W'; 'YGR041  
W'; 'YGR043C'; 'YGR044C'; 'YGR046W'; 'YGR047C'; 'YGR048W'; 'YGR049W'; 'YGR054W'; 'YGR055W'; 'YGR056  
W'; 'YGR057C'; 'YGR058W'; 'YGR059W'; 'YGR060W'; 'YGR061C'; 'YGR062C'; 'YGR063C'; 'YGR065C'; 'YGR068  
C'; 'YGR070W'; 'YGR071C'; 'YGR072W'; 'YGR074W'; 'YGR075C'; 'YGR076C'; 'YGR077C'; 'YGR078C'; 'YGR080  
W'; 'YGR081C'; 'YGR082W'; 'YGR083C'; 'YGR084C'; 'YGR085C'; 'YGR086C'; 'YGR087C'; 'YGR088W'; 'YGR089  
W'; 'YGR090W'; 'YGR091W'; 'YGR092W'; 'YGR094W'; 'YGR095C'; 'YGR096W'; 'YGR097W'; 'YGR098C'; 'YGR099  
W'; 'YGR100W'; 'YGR101W'; 'YGR102C'; 'YGR103W'; 'YGR104C'; 'YGR105W'; 'YGR106C'; 'YGR108W'; 'YGR109  
C'; 'YGR110W'; 'YGR112W'; 'YGR113W'; 'YGR116W'; 'YGR118W'; 'YGR119C'; 'YGR120C'; 'YGR121C'; 'YGR122  
W'; 'YGR123C'; 'YGR124W'; 'YGR128C'; 'YGR129W'; 'YGR130C'; 'YGR131W'; 'YGR132C'; 'YGR133W'; 'YGR134  
W'; 'YGR135W'; 'YGR136W'; 'YGR138C'; 'YGR140W'; 'YGR141W'; 'YGR142W'; 'YGR143W'; 'YGR144W'; 'YGR145  
W'; 'YGR146C'; 'YGR147C'; 'YGR148C'; 'YGR150C'; 'YGR152C'; 'YGR154C'; 'YGR155W'; 'YGR156W'; 'YGR157  
W'; 'YGR158C'; 'YGR159C'; 'YGR162W'; 'YGR163W'; 'YGR165W'; 'YGR166W'; 'YGR167W'; 'YGR169C'; 'YGR170  
W'; 'YGR171C'; 'YGR172C'; 'YGR173W'; 'YGR174C'; 'YGR175C'; 'YGR177C'; 'YGR178C'; 'YGR179C'; 'YGR180  
C'; 'YGR181W'; 'YGR183C'; 'YGR184C'; 'YGR185C'; 'YGR186W'; 'YGR187C'; 'YGR188C'; 'YGR189C'; 'YGR191  
W'; 'YGR192C'; 'YGR193C'; 'YGR194C'; 'YGR195W'; 'YGR196C'; 'YGR197C'; 'YGR198W'; 'YGR199W'; 'YGR200  
C'; 'YGR202C'; 'YGR203W'; 'YGR204W'; 'YGR205W'; 'YGR206W'; 'YGR207C'; 'YGR208W'; 'YGR209C'; 'YGR211  
W'; 'YGR212W'; 'YGR213C'; 'YGR214W'; 'YGR215W'; 'YGR216C'; 'YGR217W'; 'YGR218W'; 'YGR220C'; 'YGR221  
C'; 'YGR222W'; 'YGR223C'; 'YGR224W'; 'YGR225W'; 'YGR227W'; 'YGR229C'; 'YGR230W'; 'YGR231C'; 'YGR232  
W'; 'YGR233C'; 'YGR234W'; 'YGR235C'; 'YGR236C'; 'YGR238C'; 'YGR239C'; 'YGR240C'; 'YGR241C'; 'YGR243  
W'; 'YGR244C'; 'YGR245C'; 'YGR246C'; 'YGR247W'; 'YGR248W'; 'YGR249W'; 'YGR250C'; 'YGR251W'; 'YGR252  
W'; 'YGR253C'; 'YGR254W'; 'YGR255C'; 'YGR256W'; 'YGR257C'; 'YGR258C'; 'YGR260W'; 'YGR261C'; 'YGR262  
C'; 'YGR263C'; 'YGR264C'; 'YGR266W'; 'YGR267C'; 'YGR268C'; 'YGR270W'; 'YGR271C-  
A'; 'YGR271W'; 'YGR274C'; 'YGR275W'; 'YGR276C'; 'YGR277C'; 'YGR278W'; 'YGR279C'; 'YGR280C'; 'YGR281  
W'; 'YGR282C'; 'YGR283C'; 'YGR284C'; 'YGR285C'; 'YGR286C'; 'YGR287C'; 'YGR288W'; 'YGR289C'; 'YGR292  
W'; 'YGR294W'; 'YGR295C'; 'YGR296W'; 'YHL001W'; 'YHL002W'; 'YHL003C'; 'YHL004W'; 'YHL006C'; 'YHL007  
C'; 'YHL009C'; 'YHL010C'; 'YHL011C'; 'YHL013C'; 'YHL014C'; 'YHL015W'; 'YHL016C'; 'YHL019C'; 'YHL020  
C'; 'YHL021C'; 'YHL022C'; 'YHL023C'; 'YHL024W'; 'YHL025W'; 'YHL027W'; 'YHL028W'; 'YHL030W'; 'YHL031  
C'; 'YHL032C'; 'YHL033C'; 'YHL034C'; 'YHL035C'; 'YHL036W'; 'YHL038C'; 'YHL039W'; 'YHL040C'; 'YHL043  
W'; 'YHL046C'; 'YHL047C'; 'YHL048W'; 'YHR001W'; 'YHR001W-  
A'; 'YHR002W'; 'YHR003C'; 'YHR004C'; 'YHR005C'; 'YHR005C-  
A'; 'YHR006W'; 'YHR007C'; 'YHR008C'; 'YHR010W'; 'YHR011W'; 'YHR012W'; 'YHR013C'; 'YHR014W'; 'YHR015  
W'; 'YHR016C'; 'YHR017W'; 'YHR018C'; 'YHR019C'; 'YHR020W'; 'YHR021C'; 'YHR023W'; 'YHR024C'; 'YHR025  
W'; 'YHR026W'; 'YHR027C'; 'YHR028C'; 'YHR029C'; 'YHR030C'; 'YHR031C'; 'YHR032W'; 'YHR034C'; 'YHR036  
W'; 'YHR037W'; 'YHR038W'; 'YHR039C'; 'YHR039C-  
A'; 'YHR040W'; 'YHR041C'; 'YHR042W'; 'YHR043C'; 'YHR044C'; 'YHR046C'; 'YHR047C'; 'YHR049W'; 'YHR050  
W'; 'YHR051W'; 'YHR052W'; 'YHR053C'; 'YHR055C'; 'YHR056C'; 'YHR057C'; 'YHR058C'; 'YHR059W'; 'YHR060  
W'; 'YHR061C'; 'YHR062C'; 'YHR063C'; 'YHR064C'; 'YHR065C'; 'YHR066W'; 'YHR067W'; 'YHR068W'; 'YHR069  
C'; 'YHR070W'; 'YHR071W'; 'YHR072W'; 'YHR072W-  
A'; 'YHR073W'; 'YHR074W'; 'YHR075C'; 'YHR076W'; 'YHR077C'; 'YHR079C'; 'YHR079C-  
A'; 'YHR080C'; 'YHR081W'; 'YHR082C'; 'YHR083W'; 'YHR084W'; 'YHR085W'; 'YHR086W'; 'YHR087W'; 'YHR088  
W'; 'YHR089C'; 'YHR090C'; 'YHR091C'; 'YHR092C'; 'YHR094C'; 'YHR096C'; 'YHR098C'; 'YHR099W'; 'YHR100

C'; 'YHR101C'; 'YHR102W'; 'YHR103W'; 'YHR104W'; 'YHR105W'; 'YHR106W'; 'YHR107C'; 'YHR108W'; 'YHR109  
W'; 'YHR110W'; 'YHR111W'; 'YHR112C'; 'YHR113W'; 'YHR114W'; 'YHR115C'; 'YHR116W'; 'YHR117W'; 'YHR118  
C'; 'YHR119W'; 'YHR120W'; 'YHR121W'; 'YHR122W'; 'YHR123W'; 'YHR124W'; 'YHR127W'; 'YHR128W'; 'YHR129  
C'; 'YHR132C'; 'YHR132W-  
A'; 'YHR133C'; 'YHR134W'; 'YHR135C'; 'YHR136C'; 'YHR137W'; 'YHR139C'; 'YHR141C'; 'YHR142W'; 'YHR143  
W'; 'YHR143W-  
A'; 'YHR144C'; 'YHR146W'; 'YHR147C'; 'YHR148W'; 'YHR149C'; 'YHR150W'; 'YHR151C'; 'YHR152W'; 'YHR153  
C'; 'YHR154W'; 'YHR155W'; 'YHR156C'; 'YHR157W'; 'YHR158C'; 'YHR160C'; 'YHR161C'; 'YHR162W'; 'YHR163  
W'; 'YHR164C'; 'YHR165C'; 'YHR166C'; 'YHR167W'; 'YHR168W'; 'YHR169W'; 'YHR170W'; 'YHR171W'; 'YHR172  
W'; 'YHR174W'; 'YHR175W'; 'YHR176W'; 'YHR178W'; 'YHR179W'; 'YHR181W'; 'YHR183W'; 'YHR184W'; 'YHR185  
C'; 'YHR186C'; 'YHR187W'; 'YHR188C'; 'YHR189W'; 'YHR190W'; 'YHR191C'; 'YHR192W'; 'YHR193C'; 'YHR194  
W'; 'YHR195W'; 'YHR196W'; 'YHR197W'; 'YHR198C'; 'YHR199C'; 'YHR199C-  
A'; 'YHR200W'; 'YHR201C'; 'YHR203C'; 'YHR204W'; 'YHR205W'; 'YHR206W'; 'YHR207C'; 'YHR208W'; 'YHR209  
W'; 'YHR211W'; 'YHR215W'; 'YHR216W'; 'YIL002C'; 'YIL003W'; 'YIL004C'; 'YIL005W'; 'YIL006W'; 'YIL007  
C'; 'YIL008W'; 'YIL009C-  
A'; 'YIL009W'; 'YIL010W'; 'YIL011W'; 'YIL013C'; 'YIL014W'; 'YIL015W'; 'YIL016W'; 'YIL017C'; 'YIL018  
W'; 'YIL019W'; 'YIL020C'; 'YIL021W'; 'YIL022W'; 'YIL023C'; 'YIL026C'; 'YIL027C'; 'YIL030C'; 'YIL031  
W'; 'YIL033C'; 'YIL034C'; 'YIL035C'; 'YIL036W'; 'YIL037C'; 'YIL038C'; 'YIL039W'; 'YIL040W'; 'YIL041  
W'; 'YIL042C'; 'YIL043C'; 'YIL044C'; 'YIL045W'; 'YIL046W'; 'YIL047C'; 'YIL048W'; 'YIL049W'; 'YIL050  
W'; 'YIL051C'; 'YIL052C'; 'YIL053W'; 'YIL056W'; 'YIL057C'; 'YIL061C'; 'YIL062C'; 'YIL063C'; 'YIL064  
W'; 'YIL065C'; 'YIL066C'; 'YIL068C'; 'YIL069C'; 'YIL070C'; 'YIL071C'; 'YIL072W'; 'YIL073C'; 'YIL074  
C'; 'YIL075C'; 'YIL076W'; 'YIL078W'; 'YIL079C'; 'YIL083C'; 'YIL084C'; 'YIL085C'; 'YIL087C'; 'YIL088  
C'; 'YIL089W'; 'YIL090W'; 'YIL091C'; 'YIL093C'; 'YIL094C'; 'YIL095W'; 'YIL097W'; 'YIL098C'; 'YIL099  
W'; 'YIL101C'; 'YIL103W'; 'YIL104C'; 'YIL105C'; 'YIL106W'; 'YIL107C'; 'YIL109C'; 'YIL110W'; 'YIL111  
W'; 'YIL112W'; 'YIL113W'; 'YIL114C'; 'YIL115C'; 'YIL116W'; 'YIL117C'; 'YIL118W'; 'YIL119C'; 'YIL120  
W'; 'YIL121W'; 'YIL122W'; 'YIL123W'; 'YIL124W'; 'YIL125W'; 'YIL126W'; 'YIL128W'; 'YIL129C'; 'YIL130  
W'; 'YIL131C'; 'YIL132C'; 'YIL133C'; 'YIL134W'; 'YIL135C'; 'YIL136W'; 'YIL137C'; 'YIL138C'; 'YIL139  
C'; 'YIL140W'; 'YIL142W'; 'YIL143C'; 'YIL144W'; 'YIL145C'; 'YIL146C'; 'YIL147C'; 'YIL148W'; 'YIL149  
C'; 'YIL150C'; 'YIL153W'; 'YIL154C'; 'YIL155C'; 'YIL156W'; 'YIL157C'; 'YIL158W'; 'YIL159W'; 'YIL160  
C'; 'YIL162W'; 'YIL164C'; 'YIL172C'; 'YIL173W'; 'YIR001C'; 'YIR002C'; 'YIR003W'; 'YIR004W'; 'YIR005  
W'; 'YIR006C'; 'YIR008C'; 'YIR009W'; 'YIR010W'; 'YIR011C'; 'YIR012W'; 'YIR013C'; 'YIR015W'; 'YIR017  
C'; 'YIR018W'; 'YIR019C'; 'YIR021W'; 'YIR022W'; 'YIR023W'; 'YIR024C'; 'YIR025W'; 'YIR026C'; 'YIR027  
C'; 'YIR028W'; 'YIR029W'; 'YIR030C'; 'YIR031C'; 'YIR032C'; 'YIR033W'; 'YIR034C'; 'YIR037W'; 'YIR038  
C'; 'YIR039C'; 'YIR041W'; 'YJL001W'; 'YJL002C'; 'YJL003W'; 'YJL004C'; 'YJL005W'; 'YJL006C'; 'YJL008  
C'; 'YJL010C'; 'YJL011C'; 'YJL012C'; 'YJL013C'; 'YJL014W'; 'YJL019W'; 'YJL020C'; 'YJL023C'; 'YJL024  
C'; 'YJL025W'; 'YJL026W'; 'YJL028W'; 'YJL029C'; 'YJL030W'; 'YJL031C'; 'YJL033W'; 'YJL034W'; 'YJL035  
C'; 'YJL036W'; 'YJL037W'; 'YJL038C'; 'YJL039C'; 'YJL041W'; 'YJL042W'; 'YJL044C'; 'YJL045W'; 'YJL046  
W'; 'YJL047C'; 'YJL048C'; 'YJL050W'; 'YJL051W'; 'YJL052W'; 'YJL053W'; 'YJL054W'; 'YJL056C'; 'YJL057  
C'; 'YJL058C'; 'YJL059W'; 'YJL060W'; 'YJL061W'; 'YJL062W'; 'YJL062W-  
A'; 'YJL063C'; 'YJL065C'; 'YJL066C'; 'YJL068C'; 'YJL069C'; 'YJL071W'; 'YJL072C'; 'YJL073W'; 'YJL074  
C'; 'YJL076W'; 'YJL077C'; 'YJL078C'; 'YJL079C'; 'YJL080C'; 'YJL081C'; 'YJL082W'; 'YJL083W'; 'YJL084  
C'; 'YJL085W'; 'YJL087C'; 'YJL088W'; 'YJL089W'; 'YJL090C'; 'YJL091C'; 'YJL092W'; 'YJL093C'; 'YJL094  
C'; 'YJL095W'; 'YJL096W'; 'YJL097W'; 'YJL098W'; 'YJL099W'; 'YJL100W'; 'YJL101C'; 'YJL102W'; 'YJL103  
C'; 'YJL104W'; 'YJL105W'; 'YJL106W'; 'YJL108C'; 'YJL109C'; 'YJL110C'; 'YJL111W'; 'YJL112W'; 'YJL115  
W'; 'YJL116C'; 'YJL117W'; 'YJL118W'; 'YJL121C'; 'YJL122W'; 'YJL123C'; 'YJL124C'; 'YJL125C'; 'YJL126  
W'; 'YJL127C'; 'YJL128C'; 'YJL129C'; 'YJL130C'; 'YJL131C'; 'YJL133W'; 'YJL134W'; 'YJL136C'; 'YJL137  
C'; 'YJL138C'; 'YJL139C'; 'YJL140W'; 'YJL141C'; 'YJL143W'; 'YJL144W'; 'YJL145W'; 'YJL146W'; 'YJL148  
W'; 'YJL149W'; 'YJL151C'; 'YJL153C'; 'YJL154C'; 'YJL155C'; 'YJL156C'; 'YJL157C'; 'YJL158C'; 'YJL159  
W'; 'YJL162C'; 'YJL164C'; 'YJL165C'; 'YJL166W'; 'YJL167W'; 'YJL168C'; 'YJL170C'; 'YJL171C'; 'YJL172  
W'; 'YJL173C'; 'YJL174W'; 'YJL176C'; 'YJL177W'; 'YJL178C'; 'YJL179W'; 'YJL180C'; 'YJL183W'; 'YJL184  
W'; 'YJL185C'; 'YJL186W'; 'YJL187C'; 'YJL189W'; 'YJL190C'; 'YJL191W'; 'YJL192C'; 'YJL194W'; 'YJL196  
C'; 'YJL197W'; 'YJL198W'; 'YJL200C'; 'YJL201W'; 'YJL203W'; 'YJL204C'; 'YJL205C'; 'YJL207C'; 'YJL208  
C'; 'YJL209W'; 'YJL210W'; 'YJL212C'; 'YJL213W'; 'YJL214W'; 'YJL216C'; 'YJL217W'; 'YJL219W'; 'YJL221  
C'; 'YJL222W'; 'YJL223C'; 'YJR001W'; 'YJR002W'; 'YJR004C'; 'YJR005W'; 'YJR006W'; 'YJR007W'; 'YJR008  
W'; 'YJR009C'; 'YJR010C-  
A'; 'YJR010W'; 'YJR013W'; 'YJR014W'; 'YJR016C'; 'YJR017C'; 'YJR019C'; 'YJR021C'; 'YJR022W'; 'YJR024  
C'; 'YJR025C'; 'YJR031C'; 'YJR032W'; 'YJR033C'; 'YJR034W'; 'YJR035W'; 'YJR036C'; 'YJR040W'; 'YJR041  
C'; 'YJR042W'; 'YJR043C'; 'YJR044C'; 'YJR045C'; 'YJR046W'; 'YJR047C'; 'YJR048W'; 'YJR049C'; 'YJR050  
W'; 'YJR051W'; 'YJR052W'; 'YJR053W'; 'YJR054W'; 'YJR055W'; 'YJR057W'; 'YJR058C'; 'YJR059W'; 'YJR060  
W'; 'YJR062C'; 'YJR063W'; 'YJR064W'; 'YJR065C'; 'YJR066W'; 'YJR067C'; 'YJR068W'; 'YJR069C'; 'YJR070



C'; 'YJR072C'; 'YJR073C'; 'YJR074W'; 'YJR075W'; 'YJR076C'; 'YJR077C'; 'YJR078W'; 'YJR080C'; 'YJR082  
C'; 'YJR083C'; 'YJR084W'; 'YJR086W'; 'YJR088C'; 'YJR089W'; 'YJR090C'; 'YJR091C'; 'YJR092W'; 'YJR093  
C'; 'YJR094C'; 'YJR094W-  
A'; 'YJR095W'; 'YJR096W'; 'YJR097W'; 'YJR099W'; 'YJR100C'; 'YJR101W'; 'YJR102C'; 'YJR103W'; 'YJR104  
C'; 'YJR105W'; 'YJR106W'; 'YJR108W'; 'YJR109C'; 'YJR110W'; 'YJR112W'; 'YJR113C'; 'YJR117W'; 'YJR118  
C'; 'YJR119C'; 'YJR120W'; 'YJR121W'; 'YJR122W'; 'YJR123W'; 'YJR125C'; 'YJR126C'; 'YJR127C'; 'YJR130  
C'; 'YJR131W'; 'YJR132W'; 'YJR133W'; 'YJR134C'; 'YJR135C'; 'YJR135W-  
A'; 'YJR136C'; 'YJR137C'; 'YJR138W'; 'YJR139C'; 'YJR140C'; 'YJR143C'; 'YJR144W'; 'YJR145C'; 'YJR147  
W'; 'YJR148W'; 'YJR150C'; 'YJR151C'; 'YJR152W'; 'YJR153W'; 'YJR155W'; 'YJR156C'; 'YJR158W'; 'YJR159  
W'; 'YJR160C'; 'YJR161C'; 'YKL001C'; 'YKL002W'; 'YKL003C'; 'YKL004W'; 'YKL005C'; 'YKL006C-  
A'; 'YKL006W'; 'YKL007W'; 'YKL008C'; 'YKL009W'; 'YKL010C'; 'YKL011C'; 'YKL012W'; 'YKL013C'; 'YKL014  
C'; 'YKL015W'; 'YKL016C'; 'YKL017C'; 'YKL018W'; 'YKL019W'; 'YKL020C'; 'YKL021C'; 'YKL022C'; 'YKL024  
C'; 'YKL025C'; 'YKL026C'; 'YKL027W'; 'YKL028W'; 'YKL029C'; 'YKL032C'; 'YKL033W'; 'YKL034W'; 'YKL035  
W'; 'YKL037W'; 'YKL038W'; 'YKL039W'; 'YKL040C'; 'YKL041W'; 'YKL042W'; 'YKL043W'; 'YKL045W'; 'YKL046  
C'; 'YKL048C'; 'YKL049C'; 'YKL050C'; 'YKL051W'; 'YKL052C'; 'YKL053C-  
A'; 'YKL054C'; 'YKL055C'; 'YKL056C'; 'YKL057C'; 'YKL058W'; 'YKL059C'; 'YKL060C'; 'YKL062W'; 'YKL064  
W'; 'YKL065C'; 'YKL067W'; 'YKL068W'; 'YKL069W'; 'YKL072W'; 'YKL073W'; 'YKL074C'; 'YKL078W'; 'YKL079  
W'; 'YKL080W'; 'YKL081W'; 'YKL082C'; 'YKL084W'; 'YKL085W'; 'YKL086W'; 'YKL087C'; 'YKL088W'; 'YKL089  
W'; 'YKL090W'; 'YKL091C'; 'YKL092C'; 'YKL093W'; 'YKL094W'; 'YKL095W'; 'YKL096W'; 'YKL096W-  
A'; 'YKL098W'; 'YKL099C'; 'YKL101W'; 'YKL103C'; 'YKL104C'; 'YKL105C'; 'YKL106W'; 'YKL108W'; 'YKL109  
W'; 'YKL110C'; 'YKL112W'; 'YKL113C'; 'YKL114C'; 'YKL116C'; 'YKL117W'; 'YKL119C'; 'YKL120W'; 'YKL122  
C'; 'YKL124W'; 'YKL125W'; 'YKL126W'; 'YKL127W'; 'YKL128C'; 'YKL129C'; 'YKL130C'; 'YKL132C'; 'YKL134  
C'; 'YKL135C'; 'YKL137W'; 'YKL138C'; 'YKL138C-  
A'; 'YKL139W'; 'YKL140W'; 'YKL141W'; 'YKL142W'; 'YKL143W'; 'YKL144C'; 'YKL145W'; 'YKL146W'; 'YKL148  
C'; 'YKL149C'; 'YKL150W'; 'YKL151C'; 'YKL152C'; 'YKL154W'; 'YKL155C'; 'YKL156W'; 'YKL157W'; 'YKL159  
C'; 'YKL160W'; 'YKL161C'; 'YKL163W'; 'YKL164C'; 'YKL165C'; 'YKL166C'; 'YKL167C'; 'YKL168C'; 'YKL170  
W'; 'YKL171W'; 'YKL172W'; 'YKL173W'; 'YKL174C'; 'YKL175W'; 'YKL176C'; 'YKL178C'; 'YKL179C'; 'YKL180  
W'; 'YKL181W'; 'YKL182W'; 'YKL183W'; 'YKL184W'; 'YKL185W'; 'YKL186C'; 'YKL188C'; 'YKL189W'; 'YKL190  
W'; 'YKL191W'; 'YKL192C'; 'YKL193C'; 'YKL194C'; 'YKL195W'; 'YKL196C'; 'YKL197C'; 'YKL198C'; 'YKL201  
C'; 'YKL203C'; 'YKL204W'; 'YKL205W'; 'YKL206C'; 'YKL207W'; 'YKL208W'; 'YKL209C'; 'YKL210W'; 'YKL211  
C'; 'YKL212W'; 'YKL213C'; 'YKL214C'; 'YKL215C'; 'YKL216W'; 'YKL217W'; 'YKL218C'; 'YKL219W'; 'YKL220  
C'; 'YKL221W'; 'YKL222C'; 'YKL224C'; 'YKR001C'; 'YKR002W'; 'YKR003W'; 'YKR004C'; 'YKR006C'; 'YKR007  
W'; 'YKR008W'; 'YKR009C'; 'YKR010C'; 'YKR013W'; 'YKR014C'; 'YKR016W'; 'YKR017C'; 'YKR019C'; 'YKR020  
W'; 'YKR021W'; 'YKR022C'; 'YKR024C'; 'YKR025W'; 'YKR026C'; 'YKR027W'; 'YKR028W'; 'YKR029C'; 'YKR030  
W'; 'YKR031C'; 'YKR034W'; 'YKR035W-  
A'; 'YKR036C'; 'YKR037C'; 'YKR038C'; 'YKR039W'; 'YKR041W'; 'YKR042W'; 'YKR043C'; 'YKR044W'; 'YKR046  
C'; 'YKR048C'; 'YKR049C'; 'YKR050W'; 'YKR052C'; 'YKR053C'; 'YKR054C'; 'YKR055W'; 'YKR056W'; 'YKR057  
W'; 'YKR058W'; 'YKR059W'; 'YKR060W'; 'YKR061W'; 'YKR062W'; 'YKR063C'; 'YKR064W'; 'YKR065C'; 'YKR066  
C'; 'YKR067W'; 'YKR068C'; 'YKR069W'; 'YKR071C'; 'YKR072C'; 'YKR074W'; 'YKR076W'; 'YKR077W'; 'YKR078  
W'; 'YKR079C'; 'YKR080W'; 'YKR081C'; 'YKR082W'; 'YKR083C'; 'YKR084C'; 'YKR085C'; 'YKR086W'; 'YKR087  
C'; 'YKR088C'; 'YKR089C'; 'YKR090W'; 'YKR091W'; 'YKR092C'; 'YKR093W'; 'YKR094C'; 'YKR095W'; 'YKR095  
W-  
A'; 'YKR096W'; 'YKR097W'; 'YKR098C'; 'YKR099W'; 'YKR100C'; 'YKR101W'; 'YKR102W'; 'YKR103W'; 'YKR104  
W'; 'YKR106W'; 'YLL001W'; 'YLL002W'; 'YLL003W'; 'YLL004W'; 'YLL005C'; 'YLL006W'; 'YLL008W'; 'YLL009  
C'; 'YLL010C'; 'YLL011W'; 'YLL012W'; 'YLL013C'; 'YLL014W'; 'YLL015W'; 'YLL018C'; 'YLL018C-  
A'; 'YLL019C'; 'YLL021W'; 'YLL022C'; 'YLL023C'; 'YLL024C'; 'YLL025W'; 'YLL026W'; 'YLL027W'; 'YLL028  
W'; 'YLL029W'; 'YLL031C'; 'YLL032C'; 'YLL033W'; 'YLL034C'; 'YLL035W'; 'YLL036C'; 'YLL038C'; 'YLL039  
C'; 'YLL040C'; 'YLL041C'; 'YLL042C'; 'YLL043W'; 'YLL045C'; 'YLL046C'; 'YLL048C'; 'YLL049W'; 'YLL050  
C'; 'YLL051C'; 'YLL052C'; 'YLL055W'; 'YLL057C'; 'YLL060C'; 'YLL061W'; 'YLL062C'; 'YLL063C'; 'YLL064  
C'; 'YLR002C'; 'YLR003C'; 'YLR004C'; 'YLR005W'; 'YLR006C'; 'YLR007W'; 'YLR008C'; 'YLR009W'; 'YLR010  
C'; 'YLR011W'; 'YLR013W'; 'YLR014C'; 'YLR015W'; 'YLR016C'; 'YLR017W'; 'YLR018C'; 'YLR019W'; 'YLR020  
C'; 'YLR021W'; 'YLR022C'; 'YLR023C'; 'YLR024C'; 'YLR025W'; 'YLR026C'; 'YLR027C'; 'YLR028C'; 'YLR029  
C'; 'YLR032W'; 'YLR033W'; 'YLR034C'; 'YLR035C'; 'YLR037C'; 'YLR038C'; 'YLR039C'; 'YLR043C'; 'YLR044  
C'; 'YLR045C'; 'YLR047C'; 'YLR048W'; 'YLR051C'; 'YLR052W'; 'YLR054C'; 'YLR055C'; 'YLR056W'; 'YLR057  
W'; 'YLR058C'; 'YLR059C'; 'YLR060W'; 'YLR061W'; 'YLR064W'; 'YLR065C'; 'YLR066W'; 'YLR067C'; 'YLR068  
W'; 'YLR069C'; 'YLR070C'; 'YLR071C'; 'YLR073C'; 'YLR074C'; 'YLR075W'; 'YLR077W'; 'YLR078C'; 'YLR079  
W'; 'YLR080W'; 'YLR081W'; 'YLR082C'; 'YLR083C'; 'YLR084C'; 'YLR085C'; 'YLR086W'; 'YLR087C'; 'YLR088  
W'; 'YLR089C'; 'YLR090W'; 'YLR091W'; 'YLR092W'; 'YLR093C'; 'YLR094C'; 'YLR095C'; 'YLR096W'; 'YLR097  
C'; 'YLR098C'; 'YLR099C'; 'YLR099W-  
A'; 'YLR100W'; 'YLR102C'; 'YLR103C'; 'YLR105C'; 'YLR106C'; 'YLR107W'; 'YLR109W'; 'YLR110C'; 'YLR113

W'; 'YLR114C'; 'YLR115W'; 'YLR116W'; 'YLR117C'; 'YLR118C'; 'YLR119W'; 'YLR120C'; 'YLR121C'; 'YLR127  
C'; 'YLR128W'; 'YLR129W'; 'YLR130C'; 'YLR131C'; 'YLR132C'; 'YLR133W'; 'YLR134W'; 'YLR135W'; 'YLR136  
C'; 'YLR137W'; 'YLR138W'; 'YLR139C'; 'YLR141W'; 'YLR142W'; 'YLR144C'; 'YLR145W'; 'YLR146C'; 'YLR147  
C'; 'YLR148W'; 'YLR150W'; 'YLR151C'; 'YLR153C'; 'YLR154C'; 'YLR154W-  
C'; 'YLR155C'; 'YLR157C'; 'YLR158C'; 'YLR160C'; 'YLR162W'; 'YLR163C'; 'YLR164W'; 'YLR165C'; 'YLR166  
C'; 'YLR167W'; 'YLR168C'; 'YLR170C'; 'YLR172C'; 'YLR174W'; 'YLR175W'; 'YLR176C'; 'YLR178C'; 'YLR179  
C'; 'YLR180W'; 'YLR181C'; 'YLR182W'; 'YLR183C'; 'YLR185W'; 'YLR186W'; 'YLR188W'; 'YLR189C'; 'YLR190  
W'; 'YLR191W'; 'YLR192C'; 'YLR193C'; 'YLR194C'; 'YLR195C'; 'YLR196W'; 'YLR197W'; 'YLR199C'; 'YLR200  
W'; 'YLR201C'; 'YLR203C'; 'YLR204W'; 'YLR205C'; 'YLR206W'; 'YLR207W'; 'YLR208W'; 'YLR209C'; 'YLR210  
W'; 'YLR212C'; 'YLR213C'; 'YLR214W'; 'YLR215C'; 'YLR216C'; 'YLR218C'; 'YLR219W'; 'YLR220W'; 'YLR221  
C'; 'YLR222C'; 'YLR223C'; 'YLR226W'; 'YLR227C'; 'YLR228C'; 'YLR229C'; 'YLR231C'; 'YLR233C'; 'YLR234  
W'; 'YLR237W'; 'YLR238W'; 'YLR239C'; 'YLR240W'; 'YLR242C'; 'YLR243W'; 'YLR244C'; 'YLR245C'; 'YLR246  
W'; 'YLR247C'; 'YLR248W'; 'YLR249W'; 'YLR250W'; 'YLR251W'; 'YLR254C'; 'YLR256W'; 'YLR258W'; 'YLR259  
C'; 'YLR260W'; 'YLR262C'; 'YLR262C-  
A'; 'YLR263W'; 'YLR264W'; 'YLR265C'; 'YLR266C'; 'YLR268W'; 'YLR270W'; 'YLR272C'; 'YLR273C'; 'YLR274  
W'; 'YLR275W'; 'YLR276C'; 'YLR277C'; 'YLR284C'; 'YLR285W'; 'YLR286C'; 'YLR287C-  
A'; 'YLR288C'; 'YLR289W'; 'YLR291C'; 'YLR292C'; 'YLR293C'; 'YLR295C'; 'YLR298C'; 'YLR299W'; 'YLR300  
W'; 'YLR301W'; 'YLR303W'; 'YLR304C'; 'YLR305C'; 'YLR306W'; 'YLR307W'; 'YLR308W'; 'YLR309C'; 'YLR310  
C'; 'YLR312W-  
A'; 'YLR313C'; 'YLR314C'; 'YLR315W'; 'YLR316C'; 'YLR318W'; 'YLR319C'; 'YLR320W'; 'YLR321C'; 'YLR323  
C'; 'YLR324W'; 'YLR325C'; 'YLR327C'; 'YLR328W'; 'YLR329W'; 'YLR330W'; 'YLR332W'; 'YLR333C'; 'YLR335  
W'; 'YLR336C'; 'YLR337C'; 'YLR340W'; 'YLR341W'; 'YLR342W'; 'YLR343W'; 'YLR344W'; 'YLR347C'; 'YLR348  
C'; 'YLR350W'; 'YLR351C'; 'YLR353W'; 'YLR354C'; 'YLR355C'; 'YLR356W'; 'YLR357W'; 'YLR359W'; 'YLR360  
W'; 'YLR361C'; 'YLR362W'; 'YLR363C'; 'YLR364W'; 'YLR367W'; 'YLR368W'; 'YLR369W'; 'YLR370C'; 'YLR371  
W'; 'YLR372W'; 'YLR373C'; 'YLR375W'; 'YLR376C'; 'YLR377C'; 'YLR378C'; 'YLR380W'; 'YLR381W'; 'YLR382  
C'; 'YLR383W'; 'YLR384C'; 'YLR385C'; 'YLR386W'; 'YLR387C'; 'YLR388W'; 'YLR389C'; 'YLR390W'; 'YLR390  
W-  
A'; 'YLR392C'; 'YLR393W'; 'YLR394W'; 'YLR395C'; 'YLR396C'; 'YLR397C'; 'YLR398C'; 'YLR399C'; 'YLR401  
C'; 'YLR403W'; 'YLR404W'; 'YLR405W'; 'YLR406C'; 'YLR409C'; 'YLR410W'; 'YLR411W'; 'YLR412W'; 'YLR414  
C'; 'YLR417W'; 'YLR418C'; 'YLR420W'; 'YLR421C'; 'YLR423C'; 'YLR424W'; 'YLR425W'; 'YLR427W'; 'YLR429  
W'; 'YLR430W'; 'YLR431C'; 'YLR432W'; 'YLR433C'; 'YLR435W'; 'YLR436C'; 'YLR437C'; 'YLR438C-  
A'; 'YLR438W'; 'YLR439W'; 'YLR440C'; 'YLR441C'; 'YLR442C'; 'YLR443W'; 'YLR445W'; 'YLR447C'; 'YLR448  
W'; 'YLR449W'; 'YLR450W'; 'YLR451W'; 'YLR452C'; 'YLR453C'; 'YLR457C'; 'YLR459W'; 'YLR461W'; 'YLR466  
W'; 'YLR467W'; 'YML001W'; 'YML004C'; 'YML005W'; 'YML006C'; 'YML007W'; 'YML008C'; 'YML009C'; 'YML010  
W'; 'YML011C'; 'YML012W'; 'YML013W'; 'YML014W'; 'YML015C'; 'YML016C'; 'YML017W'; 'YML019W'; 'YML021  
C'; 'YML022W'; 'YML023C'; 'YML024W'; 'YML025C'; 'YML026C'; 'YML027W'; 'YML028W'; 'YML029W'; 'YML030  
W'; 'YML031W'; 'YML032C'; 'YML034W'; 'YML035C'; 'YML036W'; 'YML038C'; 'YML041C'; 'YML042W'; 'YML043  
C'; 'YML046W'; 'YML047C'; 'YML048W'; 'YML049C'; 'YML050W'; 'YML051W'; 'YML052W'; 'YML054C'; 'YML055  
W'; 'YML056C'; 'YML057W'; 'YML058W'; 'YML058W-  
A'; 'YML059C'; 'YML060W'; 'YML061C'; 'YML062C'; 'YML063W'; 'YML064C'; 'YML065W'; 'YML066C'; 'YML067  
C'; 'YML068W'; 'YML069W'; 'YML070W'; 'YML071C'; 'YML072C'; 'YML073C'; 'YML074C'; 'YML075C'; 'YML076  
C'; 'YML077W'; 'YML078W'; 'YML080W'; 'YML081C-  
A'; 'YML081W'; 'YML085C'; 'YML086C'; 'YML087C'; 'YML088W'; 'YML091C'; 'YML092C'; 'YML093W'; 'YML094  
W'; 'YML095C'; 'YML097C'; 'YML098W'; 'YML099C'; 'YML100W'; 'YML101C'; 'YML102W'; 'YML103C'; 'YML104  
C'; 'YML105C'; 'YML106W'; 'YML107C'; 'YML109W'; 'YML110C'; 'YML111W'; 'YML112W'; 'YML113W'; 'YML114  
C'; 'YML115C'; 'YML116W'; 'YML117W'; 'YML118W'; 'YML120C'; 'YML121W'; 'YML123C'; 'YML124C'; 'YML125  
C'; 'YML126C'; 'YML127W'; 'YML128C'; 'YML129C'; 'YML130C'; 'YML132W'; 'YMR001C'; 'YMR002W'; 'YMR003  
W'; 'YMR004W'; 'YMR005W'; 'YMR006C'; 'YMR008C'; 'YMR009W'; 'YMR011W'; 'YMR012W'; 'YMR013C'; 'YMR014  
W'; 'YMR015C'; 'YMR016C'; 'YMR017W'; 'YMR019W'; 'YMR020W'; 'YMR021C'; 'YMR022W'; 'YMR023C'; 'YMR024  
W'; 'YMR025W'; 'YMR026C'; 'YMR028W'; 'YMR029C'; 'YMR030W'; 'YMR031C'; 'YMR032W'; 'YMR033W'; 'YMR035  
W'; 'YMR036C'; 'YMR037C'; 'YMR038C'; 'YMR039C'; 'YMR040W'; 'YMR041C'; 'YMR042W'; 'YMR043W'; 'YMR044  
W'; 'YMR047C'; 'YMR048W'; 'YMR049C'; 'YMR052W'; 'YMR053C'; 'YMR054W'; 'YMR055C'; 'YMR056C'; 'YMR058  
W'; 'YMR059W'; 'YMR060C'; 'YMR061W'; 'YMR062C'; 'YMR063W'; 'YMR064W'; 'YMR065W'; 'YMR066W'; 'YMR067  
C'; 'YMR068W'; 'YMR069W'; 'YMR070W'; 'YMR071C'; 'YMR072W'; 'YMR073C'; 'YMR074C'; 'YMR075W'; 'YMR076  
C'; 'YMR077C'; 'YMR078C'; 'YMR079W'; 'YMR080C'; 'YMR081C'; 'YMR083W'; 'YMR086W'; 'YMR087W'; 'YMR088  
C'; 'YMR089C'; 'YMR091C'; 'YMR092C'; 'YMR093W'; 'YMR094W'; 'YMR095C'; 'YMR096W'; 'YMR097C'; 'YMR098  
C'; 'YMR099C'; 'YMR100W'; 'YMR101C'; 'YMR104C'; 'YMR105C'; 'YMR106C'; 'YMR107W'; 'YMR108W'; 'YMR109  
W'; 'YMR110C'; 'YMR112C'; 'YMR113W'; 'YMR114C'; 'YMR115W'; 'YMR116C'; 'YMR117C'; 'YMR119W'; 'YMR120  
C'; 'YMR121C'; 'YMR123W'; 'YMR125W'; 'YMR127C'; 'YMR128W'; 'YMR129W'; 'YMR131C'; 'YMR133W'; 'YMR135  
C'; 'YMR136W'; 'YMR137C'; 'YMR138W'; 'YMR139W'; 'YMR140W'; 'YMR142C'; 'YMR143W'; 'YMR145C'; 'YMR146



W'; 'YOL049W'; 'YOL051W'; 'YOL052C'; 'YOL052C-  
A'; 'YOL053W'; 'YOL054W'; 'YOL055C'; 'YOL056W'; 'YOL057W'; 'YOL058W'; 'YOL059W'; 'YOL060C'; 'YOL061  
W'; 'YOL062C'; 'YOL063C'; 'YOL064C'; 'YOL065C'; 'YOL066C'; 'YOL067C'; 'YOL068C'; 'YOL069W'; 'YOL070  
C'; 'YOL071W'; 'YOL072W'; 'YOL076W'; 'YOL077C'; 'YOL077W-  
A'; 'YOL078W'; 'YOL080C'; 'YOL081W'; 'YOL082W'; 'YOL083W'; 'YOL084W'; 'YOL086C'; 'YOL086W-  
A'; 'YOL087C'; 'YOL088C'; 'YOL089C'; 'YOL090W'; 'YOL091W'; 'YOL092W'; 'YOL093W'; 'YOL094C'; 'YOL095  
C'; 'YOL096C'; 'YOL097C'; 'YOL100W'; 'YOL101C'; 'YOL102C'; 'YOL103W'; 'YOL104C'; 'YOL105C'; 'YOL108  
C'; 'YOL109W'; 'YOL110W'; 'YOL111C'; 'YOL112W'; 'YOL113W'; 'YOL115W'; 'YOL116W'; 'YOL117W'; 'YOL119  
C'; 'YOL120C'; 'YOL121C'; 'YOL122C'; 'YOL123W'; 'YOL124C'; 'YOL125W'; 'YOL126C'; 'YOL127W'; 'YOL128  
C'; 'YOL129W'; 'YOL130W'; 'YOL132W'; 'YOL133W'; 'YOL135C'; 'YOL136C'; 'YOL137W'; 'YOL138C'; 'YOL139  
C'; 'YOL140W'; 'YOL141W'; 'YOL142W'; 'YOL143C'; 'YOL144W'; 'YOL145C'; 'YOL146W'; 'YOL147C'; 'YOL148  
C'; 'YOL149W'; 'YOL151W'; 'YOL152W'; 'YOL154W'; 'YOL155C'; 'YOL156W'; 'YOL157C'; 'YOL158C'; 'YOL159  
C'; 'YOL159C-  
A'; 'YOL161C'; 'YOL164W'; 'YOL165C'; 'YOR001W'; 'YOR002W'; 'YOR003W'; 'YOR004W'; 'YOR005C'; 'YOR006  
C'; 'YOR007C'; 'YOR008C'; 'YOR009W'; 'YOR010C'; 'YOR011W'; 'YOR014W'; 'YOR016C'; 'YOR017W'; 'YOR018  
W'; 'YOR019W'; 'YOR020C'; 'YOR021C'; 'YOR023C'; 'YOR025W'; 'YOR026W'; 'YOR027W'; 'YOR028C'; 'YOR030  
W'; 'YOR031W'; 'YOR032C'; 'YOR033C'; 'YOR034C'; 'YOR035C'; 'YOR036W'; 'YOR037W'; 'YOR038C'; 'YOR039  
W'; 'YOR040W'; 'YOR042W'; 'YOR043W'; 'YOR044W'; 'YOR045W'; 'YOR046C'; 'YOR047C'; 'YOR048C'; 'YOR049  
C'; 'YOR051C'; 'YOR052C'; 'YOR054C'; 'YOR056C'; 'YOR057W'; 'YOR058C'; 'YOR060C'; 'YOR061W'; 'YOR063  
W'; 'YOR064C'; 'YOR065W'; 'YOR066W'; 'YOR067C'; 'YOR068C'; 'YOR069W'; 'YOR070C'; 'YOR071C'; 'YOR073  
W'; 'YOR074C'; 'YOR075W'; 'YOR076C'; 'YOR077W'; 'YOR078W'; 'YOR079C'; 'YOR080W'; 'YOR081C'; 'YOR083  
W'; 'YOR084W'; 'YOR085W'; 'YOR086C'; 'YOR087W'; 'YOR089C'; 'YOR090C'; 'YOR091W'; 'YOR092W'; 'YOR094  
W'; 'YOR095C'; 'YOR096W'; 'YOR098C'; 'YOR099W'; 'YOR100C'; 'YOR101W'; 'YOR103C'; 'YOR104W'; 'YOR106  
W'; 'YOR107W'; 'YOR108W'; 'YOR109W'; 'YOR110W'; 'YOR112W'; 'YOR113W'; 'YOR115C'; 'YOR116C'; 'YOR117  
W'; 'YOR118W'; 'YOR119C'; 'YOR120W'; 'YOR122C'; 'YOR123C'; 'YOR124C'; 'YOR125C'; 'YOR126C'; 'YOR127  
W'; 'YOR128C'; 'YOR129C'; 'YOR130C'; 'YOR132W'; 'YOR133W'; 'YOR134W'; 'YOR136W'; 'YOR137C'; 'YOR138  
C'; 'YOR140W'; 'YOR141C'; 'YOR142W'; 'YOR143C'; 'YOR144C'; 'YOR145C'; 'YOR147W'; 'YOR148C'; 'YOR149  
C'; 'YOR150W'; 'YOR151C'; 'YOR153W'; 'YOR155C'; 'YOR156C'; 'YOR157C'; 'YOR158W'; 'YOR159C'; 'YOR160  
W'; 'YOR161C'; 'YOR162C'; 'YOR163W'; 'YOR164C'; 'YOR165W'; 'YOR166C'; 'YOR167C'; 'YOR168W'; 'YOR171  
C'; 'YOR172W'; 'YOR173W'; 'YOR174W'; 'YOR175C'; 'YOR176W'; 'YOR177C'; 'YOR178C'; 'YOR179C'; 'YOR180  
C'; 'YOR181W'; 'YOR182C'; 'YOR184W'; 'YOR185C'; 'YOR187W'; 'YOR188W'; 'YOR189W'; 'YOR190W'; 'YOR191  
W'; 'YOR192C'; 'YOR193W'; 'YOR194C'; 'YOR195W'; 'YOR196C'; 'YOR197W'; 'YOR198C'; 'YOR201C'; 'YOR202  
W'; 'YOR204W'; 'YOR205C'; 'YOR206W'; 'YOR207C'; 'YOR208W'; 'YOR209C'; 'YOR210W'; 'YOR211C'; 'YOR212  
W'; 'YOR213C'; 'YOR215C'; 'YOR216C'; 'YOR217W'; 'YOR219C'; 'YOR221C'; 'YOR222W'; 'YOR223W'; 'YOR224  
C'; 'YOR226C'; 'YOR227W'; 'YOR228C'; 'YOR229W'; 'YOR230W'; 'YOR231W'; 'YOR232W'; 'YOR233W'; 'YOR234  
C'; 'YOR236W'; 'YOR237W'; 'YOR239W'; 'YOR241W'; 'YOR242C'; 'YOR243C'; 'YOR244W'; 'YOR245C'; 'YOR246  
C'; 'YOR247W'; 'YOR249C'; 'YOR250C'; 'YOR251C'; 'YOR252W'; 'YOR253W'; 'YOR254C'; 'YOR255W'; 'YOR256  
C'; 'YOR257W'; 'YOR258W'; 'YOR259C'; 'YOR260W'; 'YOR261C'; 'YOR262W'; 'YOR264W'; 'YOR265W'; 'YOR266  
W'; 'YOR267C'; 'YOR269W'; 'YOR270C'; 'YOR272W'; 'YOR273C'; 'YOR274W'; 'YOR275C'; 'YOR276W'; 'YOR278  
W'; 'YOR279C'; 'YOR280C'; 'YOR281C'; 'YOR283W'; 'YOR284W'; 'YOR285W'; 'YOR286W'; 'YOR287C'; 'YOR288  
C'; 'YOR290C'; 'YOR291W'; 'YOR293W'; 'YOR294W'; 'YOR295W'; 'YOR297C'; 'YOR298C-  
A'; 'YOR298W'; 'YOR299W'; 'YOR301W'; 'YOR302W'; 'YOR303W'; 'YOR304W'; 'YOR305W'; 'YOR306C'; 'YOR307  
C'; 'YOR308C'; 'YOR310C'; 'YOR311C'; 'YOR312C'; 'YOR313C'; 'YOR315W'; 'YOR316C'; 'YOR317W'; 'YOR319  
W'; 'YOR320C'; 'YOR321W'; 'YOR322C'; 'YOR323C'; 'YOR324C'; 'YOR326W'; 'YOR327C'; 'YOR328W'; 'YOR329  
C'; 'YOR330C'; 'YOR332W'; 'YOR334W'; 'YOR335C'; 'YOR336W'; 'YOR337W'; 'YOR339C'; 'YOR340C'; 'YOR341  
W'; 'YOR344C'; 'YOR346W'; 'YOR347C'; 'YOR348C'; 'YOR349W'; 'YOR350C'; 'YOR351C'; 'YOR352W'; 'YOR353  
C'; 'YOR354C'; 'YOR355W'; 'YOR356W'; 'YOR357C'; 'YOR358W'; 'YOR359W'; 'YOR360C'; 'YOR361C'; 'YOR362  
C'; 'YOR363C'; 'YOR367W'; 'YOR368W'; 'YOR369C'; 'YOR370C'; 'YOR371C'; 'YOR372C'; 'YOR373W'; 'YOR374  
W'; 'YOR375C'; 'YOR377W'; 'YOR380W'; 'YOR381W'; 'YOR382W'; 'YOR383C'; 'YOR384W'; 'YOR386W'; 'YOR388  
C'; 'YOR391C'; 'YOR393W'; 'YOR394W'; 'YPL001W'; 'YPL002C'; 'YPL003W'; 'YPL004C'; 'YPL005W'; 'YPL006  
W'; 'YPL007C'; 'YPL008W'; 'YPL009C'; 'YPL010W'; 'YPL011C'; 'YPL012W'; 'YPL013C'; 'YPL015C'; 'YPL016  
W'; 'YPL017C'; 'YPL018W'; 'YPL019C'; 'YPL020C'; 'YPL021W'; 'YPL022W'; 'YPL023C'; 'YPL024W'; 'YPL026  
C'; 'YPL027W'; 'YPL028W'; 'YPL029W'; 'YPL030W'; 'YPL031C'; 'YPL032C'; 'YPL033C'; 'YPL036W'; 'YPL037  
C'; 'YPL038W'; 'YPL040C'; 'YPL042C'; 'YPL043W'; 'YPL045W'; 'YPL046C'; 'YPL047W'; 'YPL048W'; 'YPL049  
C'; 'YPL050C'; 'YPL051W'; 'YPL052W'; 'YPL053C'; 'YPL054W'; 'YPL055C'; 'YPL057C'; 'YPL058C'; 'YPL059  
W'; 'YPL060W'; 'YPL061W'; 'YPL063W'; 'YPL064C'; 'YPL065W'; 'YPL066W'; 'YPL069C'; 'YPL070W'; 'YPL072  
W'; 'YPL074W'; 'YPL075W'; 'YPL076W'; 'YPL078C'; 'YPL079W'; 'YPL081W'; 'YPL082C'; 'YPL083C'; 'YPL084  
W'; 'YPL085W'; 'YPL086C'; 'YPL087W'; 'YPL089C'; 'YPL090C'; 'YPL091W'; 'YPL092W'; 'YPL093W'; 'YPL094  
C'; 'YPL095C'; 'YPL096C-  
A'; 'YPL096W'; 'YPL097W'; 'YPL098C'; 'YPL099C'; 'YPL100W'; 'YPL101W'; 'YPL103C'; 'YPL104W'; 'YPL105

```
C'; 'YPL106C'; 'YPL110C'; 'YPL111W'; 'YPL112C'; 'YPL115C'; 'YPL116W'; 'YPL117C'; 'YPL118W'; 'YPL119
C'; 'YPL120W'; 'YPL121C'; 'YPL122C'; 'YPL123C'; 'YPL124W'; 'YPL125W'; 'YPL126W'; 'YPL127C'; 'YPL128
C'; 'YPL129W'; 'YPL130W'; 'YPL131W'; 'YPL132W'; 'YPL133C'; 'YPL134C'; 'YPL135W'; 'YPL137C'; 'YPL138
C'; 'YPL139C'; 'YPL140C'; 'YPL141C'; 'YPL143W'; 'YPL144W'; 'YPL145C'; 'YPL146C'; 'YPL147W'; 'YPL148
C'; 'YPL149W'; 'YPL151C'; 'YPL152W'; 'YPL153C'; 'YPL154C'; 'YPL155C'; 'YPL156C'; 'YPL157W'; 'YPL158
C'; 'YPL159C'; 'YPL160W'; 'YPL161C'; 'YPL163C'; 'YPL164C'; 'YPL165C'; 'YPL166W'; 'YPL167C'; 'YPL169
C'; 'YPL170W'; 'YPL171C'; 'YPL172C'; 'YPL173W'; 'YPL174C'; 'YPL175W'; 'YPL176C'; 'YPL177C'; 'YPL178
W'; 'YPL179W'; 'YPL180W'; 'YPL181W'; 'YPL183C'; 'YPL183W-
A'; 'YPL184C'; 'YPL186C'; 'YPL187W'; 'YPL188W'; 'YPL189C-
A'; 'YPL189W'; 'YPL190C'; 'YPL192C'; 'YPL193W'; 'YPL194W'; 'YPL195W'; 'YPL196W'; 'YPL198W'; 'YPL200
W'; 'YPL201C'; 'YPL202C'; 'YPL203W'; 'YPL204W'; 'YPL206C'; 'YPL207W'; 'YPL208W'; 'YPL209C'; 'YPL210
C'; 'YPL211W'; 'YPL212C'; 'YPL213W'; 'YPL214C'; 'YPL215W'; 'YPL217C'; 'YPL218W'; 'YPL219W'; 'YPL220
W'; 'YPL221W'; 'YPL223C'; 'YPL224C'; 'YPL225W'; 'YPL226W'; 'YPL227C'; 'YPL228W'; 'YPL230W'; 'YPL231
W'; 'YPL232W'; 'YPL233W'; 'YPL234C'; 'YPL235W'; 'YPL236C'; 'YPL237W'; 'YPL239W'; 'YPL240C'; 'YPL241
C'; 'YPL242C'; 'YPL243W'; 'YPL244C'; 'YPL246C'; 'YPL248C'; 'YPL249C'; 'YPL249C-
A'; 'YPL250C'; 'YPL252C'; 'YPL253C'; 'YPL254W'; 'YPL255W'; 'YPL256C'; 'YPL258C'; 'YPL259C'; 'YPL262
W'; 'YPL263C'; 'YPL265W'; 'YPL266W'; 'YPL267W'; 'YPL268W'; 'YPL269W'; 'YPL270W'; 'YPL271W'; 'YPL273
W'; 'YPL274W'; 'YPL281C'; 'YPL282C'; 'YPL283C'; 'YPR001W'; 'YPR002W'; 'YPR004C'; 'YPR005C'; 'YPR006
C'; 'YPR007C'; 'YPR008W'; 'YPR009W'; 'YPR010C'; 'YPR016C'; 'YPR017C'; 'YPR018W'; 'YPR019W'; 'YPR020
W'; 'YPR021C'; 'YPR023C'; 'YPR024W'; 'YPR025C'; 'YPR026W'; 'YPR028W'; 'YPR029C'; 'YPR030W'; 'YPR031
W'; 'YPR032W'; 'YPR033C'; 'YPR034W'; 'YPR035W'; 'YPR036W'; 'YPR036W-
A'; 'YPR037C'; 'YPR040W'; 'YPR041W'; 'YPR042C'; 'YPR043W'; 'YPR045C'; 'YPR046W'; 'YPR047W'; 'YPR048
W'; 'YPR049C'; 'YPR051W'; 'YPR052C'; 'YPR054W'; 'YPR055W'; 'YPR056W'; 'YPR057W'; 'YPR058W'; 'YPR060
C'; 'YPR061C'; 'YPR062W'; 'YPR065W'; 'YPR066W'; 'YPR067W'; 'YPR068C'; 'YPR069C'; 'YPR070W'; 'YPR072
W'; 'YPR073C'; 'YPR074C'; 'YPR075C'; 'YPR079W'; 'YPR080W'; 'YPR081C'; 'YPR082C'; 'YPR083W'; 'YPR085
C'; 'YPR086W'; 'YPR088C'; 'YPR091C'; 'YPR093C'; 'YPR094W'; 'YPR095C'; 'YPR096C'; 'YPR097W'; 'YPR098
C'; 'YPR100W'; 'YPR101W'; 'YPR102C'; 'YPR103W'; 'YPR104C'; 'YPR105C'; 'YPR106W'; 'YPR107C'; 'YPR108
W'; 'YPR110C'; 'YPR111W'; 'YPR112C'; 'YPR113W'; 'YPR115W'; 'YPR116W'; 'YPR118W'; 'YPR119W'; 'YPR120
C'; 'YPR121W'; 'YPR122W'; 'YPR124W'; 'YPR125W'; 'YPR127W'; 'YPR128C'; 'YPR129W'; 'YPR131C'; 'YPR132
W'; 'YPR133C'; 'YPR133W-
A'; 'YPR134W'; 'YPR135W'; 'YPR137W'; 'YPR138C'; 'YPR139C'; 'YPR140W'; 'YPR141C'; 'YPR143W'; 'YPR144
C'; 'YPR145W'; 'YPR148C'; 'YPR149W'; 'YPR151C'; 'YPR152C'; 'YPR153W'; 'YPR154W'; 'YPR155C'; 'YPR156
C'; 'YPR158W'; 'YPR159W'; 'YPR160W'; 'YPR161C'; 'YPR162C'; 'YPR163C'; 'YPR164W'; 'YPR165W'; 'YPR166
C'; 'YPR167C'; 'YPR168W'; 'YPR169W'; 'YPR171W'; 'YPR173C'; 'YPR175W'; 'YPR176C'; 'YPR178W'; 'YPR179
C'; 'YPR180W'; 'YPR181C'; 'YPR182W'; 'YPR183W'; 'YPR184W'; 'YPR185W'; 'YPR186C'; 'YPR187W'; 'YPR188
C'; 'YPR189W'; 'YPR190C'; 'YPR191W'; 'YPR192W'; 'YPR193C'; 'YPR194C'; 'YPR198W'; 'YPR199C'; 'YPR200
C'; 'YPR201W'; 'YPR204W'; };
```

end
